1

2

3 *Effect of different forage-to-concentrate ratios on the structure of rumen*  
4 *bacteria and its relationship with nutrition levels and real-time methane*  
5 *production in sheep*

6

7

8 Runhang Li<sup>1</sup>, Zhanwei Teng<sup>1</sup>, Chaoli Lang<sup>1</sup>, Haizhu Zhou<sup>1</sup>, Weiguang Zhong<sup>1</sup>, Zhibin Ban<sup>2</sup>,

9 Xiaogang Yan<sup>2</sup>, Huaming Yang<sup>2</sup>, Mohammed Hamdy Farouk<sup>3</sup> and Yujie Lou<sup>1\*</sup>

10

11 <sup>a</sup> College of Animal Science and Technology, Jilin Agricultural University, Changchun, PR China

12 <sup>b</sup> Jilin Academy of Agricultural Sciences, Changchun, PR China

13 <sup>c</sup> Animal Production Department, Faculty of Agriculture, Al-Azhar University, Nasr City, Cairo, Egypt

14 \* Corresponding author

15 E-mail address: lyjjlau@126.com (Yujie Lou)

16

## 17 **Abstract**

18 Emission from ruminants has become the largest source of anthropogenic emission of  
19 methane in China. The structure of the rumen flora has a significant effect on methane  
20 production. To establish a more accurate prediction model for methane production, the rumen  
21 flora should be one of the most important parameters. The objective of the present study was  
22 to investigate the relationship among changes in rumen flora, nutrient levels, and methane  
23 production in sheep fed with the diets of different forage-to-concentration ratios, as well as to  
24 screen for significantly different dominant genera. Nine rumen-cannulated hybrid sheep were  
25 separated into three groups and fed three diets with forage-to-concentration ratios of 50:50,  
26 70:30, and 90:10. Three proportions of the diets were fed according to a  $3 \times 3$  incomplete  
27 Latin square, design during three periods of 15 d each. The ruminal fluid was collected for  
28 real-time qPCR, high-throughput sequencing and *in vitro* rumen fermentation in a new  
29 real-time fermentation system wit. Twenty-two genera were screened, the abundance of  
30 which varied linearly with forage-to-concentration ratios and methane production. In  
31 addition, during the 12-hour *in vitro* fermentation, the appearance of peak concentration was  
32 delayed by 26-27 min with the different structure of rumen bacteria. The fiber-degrading  
33 bacteria were positively correlated with this phenomenon, but starch-degrading and  
34 protein-degrading bacteria were negative correlated. These results would facilitate  
35 macro-control of rumen microorganisms and better management of diets for improved  
36 nutrition in ruminants. In addition, our findings would help in screening bacterial genera that  
37 are highly correlated with methane production.

38 *Keywords:* greenhouse gas, high-throughput sequencing, ruminant, rumen bacteria, rumen

39 fermentation

## 40 **Introduction**

41 Of the total methane emission in China, the emission from ruminants was estimated to  
42 be approximately 17%, turning them into the largest anthropogenic source of methane  
43 emission [1]. The emission of methane associated with agriculture is expected to see a  
44 significant increase. Therefore, new strategies were needed for reducing the emission and  
45 improving livestock productivity, which had been extensively studied and reviewed [2].

46 Rumen is the main site of methane production [3], which provided a habitat for a  
47 variety of microbes, including numerous species of bacteria, archaea, viruses, protozoa and  
48 fungi [4]. In the anaerobic environment of the rumen, several organic compounds present  
49 could eventually be decomposed into methane by a number of microorganisms [5]. The  
50 composition of ruminal microbiome was affected by different factors, such as age, breed,  
51 general well-being of the animal, its location as well as administration of feed and antibiotics  
52 [6-8]. Furthermore, feedstuffs were the main factors regulating the composition and  
53 functional patterns of ruminal microbiome [9-11]. Among the nutritional indices of diets,  
54 protein and energy levels were the major factors affecting the fermentation of ruminal  
55 microbiome [12]. Fibers, including hemicellulose and cellulose, were the main source of  
56 energy [13], which could be degraded into methane by the microbes present in the rumen.  
57 Leng and Nolan [14] pointed out that 80% of the nitrogen available to ruminal bacteria came  
58 from ammonia and 20% was derived from amino acids or oligopeptides. Therefore, the low  
59 content of ammonia promotes microorganisms to degrade other nitrogen sources in a diet  
60 with high forage-to-concentration ratios (F:C), which delays fermentation. Grovum and Leek

61 [15] found that non-structural carbohydrates were degraded much faster than structural ones.  
62 Easily degradable carbohydrates provide energy and carbon sources for faster microbial  
63 fermentation and increase fermentation rate. Methane production can be affected by the  
64 above-mentioned factors.

65 In the current models established for the same rumen microflora to predict methane  
66 production, nutritional indicators had been used as parameters [16-21]. A large number of  
67 calibration parameters are required for the models to adapt to plentiful situations, thereby  
68 limiting the scope of these models.

69 Some mechanistic models considering the role of rumen microbes [22-23] had been  
70 established by the extrapolation of mathematical formula used by computers. Because of high  
71 operation cost, it is difficult to apply these models to actual production systems. Therefore,  
72 the application scope of these models will be greatly expanded if some important  
73 microorganisms can be related with the models using nutrient indicators as parameters.

74 Previous studies have indicated that archaea are the main microorganisms producing  
75 methane in the rumen [24]. However, other recent studies involving high-throughput  
76 sequencing have shown that change in methane production is irrelevant to archaea flora, but  
77 highly correlated with bacterial flora [25]. The main function of bacteria is to break down the  
78 nutrients in the feed into simple compounds and additional products used by animals,  
79 including hydrogen, carbon dioxide and volatile fatty acids which are raw materials for  
80 methane synthesis [3]. To establish better models for methane prediction with wide range of  
81 application, characteristic microorganisms should be screened from rumen bacterial  
82 communities to serve as effective parameters.

83           Simple devices for *in vitro* fermentation have been used to establish the prediction  
84 models [21]. However, in such cases, methane production could only be detected either at  
85 specific time points or at the final time point, and therefore, did not reveal the overall  
86 fermentation status well. Sun et al. [26] used a new real-time *in vitro* fermentation system to  
87 determine the methane production time course when they studied the effect of cysteamine  
88 hydrochloride and nitrate supplementation on methane production and productivity in cattle.  
89 This system makes it possible to determine a more subtle fermentation state. Thus, in  
90 exploring the relationship between rumen microbial structure and methane production, this  
91 system may provide more detailed reference data.

92           We hypothesized that the real-time methane production of sheep would be highly  
93 correlated with the abundance of bacteria in the rumen. The objective of this study was to  
94 investigate the relationship among different structures of bacterial flora in the rumen, dietary  
95 levels, and methane production, using the *in vitro* fermentation system. The genera of  
96 bacteria that showed high correlation with methane production were screened in order to  
97 serve as the reference for accurate prediction of methane production.

## 98 **Material and methods**

### 99 **Ethics statement**

100           All research involving animals was conducted according to Guide for the Care and  
101 Use of Laboratory Animals which was approved by the ethics committee of Jilin Agricultural  
102 University, P. R. China. The ethics committee of Jilin Agricultural University, P. R. China  
103 approved this study, and the approved permit number for this study is “JLAC20171104”.

### 104 **Animals and diets**

105 A total of nine rumen-cannulated (cannulated at one year of age) hybrid sheep  
 106 (Chinese merino fine wool sheep × Dorper sheep) were selected, which was 2 years old and  
 107 whose average weight was  $87.83 \pm 8.11$  kg. Randomly assigned to three groups, these sheep  
 108 were separately fed at random. Jilin Agricultural University, Changchun, China prepared  
 109 Guide for the Care and Use of Laboratory Animals which provided guidance for all  
 110 animal-related procedures.

111 Chosen as the forage, *Leymus chinensis* was mixed with the concentrate in three  
 112 proportions including 50:50 (L), 70:30 (M) and 90:10 (H). The composition and nutrition  
 113 levels of the three diets based on the NRC [27] are shown in Table 1. The three diets were fed  
 114 according to the  $3 \times 3$  incomplete Latin square design over 45 d in three periods of 15 d each,  
 115 including 14 d of pre-feeding and the 15th day for sampling. Three distinct flora structures  
 116 were established under different treatments.

117

118 **Table 1. Ingredients and nutrient compositions of diets**

119

| Item                            | Treatments <sup>a</sup> |       |       |
|---------------------------------|-------------------------|-------|-------|
|                                 | L                       | M     | H     |
| Ingredient (Fresh matter, g/kg) |                         |       |       |
| <i>Leymus chinensis</i>         | 500.0                   | 700.0 | 900.0 |
| Corn                            | 237.5                   | 137.5 | 37.5  |
| wheat bran                      | 118.7                   | 68.7  | 18.7  |
| Soybean meal                    | 95.0                    | 55.0  | 15.0  |
| Cottonseed meal                 | 23.8                    | 13.8  | 3.8   |
| Calcium carbonate               | 4.0                     | 4.0   | 4.0   |
| Calcium hydrogen phosphate      | 5.0                     | 5.0   | 5.0   |
| Sodium chloride                 | 6.0                     | 6.0   | 6.0   |
| Premix <sup>b</sup>             | 10.0                    | 10.0  | 10.0  |
| Composition <sup>c</sup>        |                         |       |       |
| DM (g/kg)                       | 887.4                   | 889.2 | 891.1 |
| 105 °C DM (g/kg)                |                         |       |       |
| CP                              | 138.8                   | 113.9 | 89.0  |

|        |       |       |       |
|--------|-------|-------|-------|
| EE     | 25.7  | 29.7  | 33.6  |
| Ash    | 32.8  | 34.6  | 36.3  |
| Starch | 267.1 | 185.8 | 104.6 |
| NDF    | 296.2 | 398.6 | 501.0 |
| ADF    | 149.6 | 221.4 | 293.1 |
| ADL    | 31.8  | 43.1  | 54.5  |

120 DM, dry matter; CP, crude protein; EE, ether extract; NDF, neutral detergent fibre; ADF,  
121 acid detergent fiber; ADL, acid detergent lignin.

122 <sup>a</sup> L = forage-to-concentrate ratio 50:50; M = forage-to-concentrate ratio 70:30; H =  
123 forage-to-concentrate ratio 90:10.

124 <sup>b</sup> Provided per kilogram of premix: 80,000-145,000 mg of vitamin A, 20,000-39,000 mg of  
125 vitamin D,  $\geq$ 700 IU of vitamin E, 180-345 mg of Cu, 190-330 mg of Fe, 950-1,800 mg of Zn,  
126 and 350-650 mg of Mn.

127 <sup>c</sup> Calculated from the analyzed value of the dietary ingredients.

128

## 129 **Sampling and DNA extraction**

130 Ruminal fluid (400 mL) was collected by pump and pre-warmed thermos before  
131 feeding (07:00 h) and saturated with CO<sub>2</sub>. Filtrated through a double-layered gauze, the  
132 collected fluid was used to measure the pH value to confirm the health of rumen. The fluid  
133 with the pH value between 5.5 and 7.5 from three sheep of one group was mixed. All the  
134 samples with 10 mL were respectively stored in sterile centrifuge tubes (without any  
135 treatment) with 2 mL at -80 °C for high-throughput sequencing. A total of 18 samples for the  
136 three diets were collected to have six replicates for each diet. Another 300 mL of ruminal  
137 fluid from each group was warmed to 39 °C for *in vitro* rumen fermentation right after  
138 sampling.

139 Microbial genomic DNA was extracted from all ruminal fluid samples with 220 mg  
140 using the methods of Murray and Thompson [28] and Zhou et al. [29]. Agarose gel  
141 electrophoresis was applied to confirm the successful extraction of DNA [30]. The qualified  
142 DNA continued to be tested for real-time quantitative polymerase chain reaction (qPCR) and  
143 high-throughput sequencing. A total of 9 samples for the three diets were collected and each  
144 sample was tested twice in order to have six replicates for each diet.

### 145 **Real-time qPCR for total bacteria, methanogens, protozoa and** 146 **anaerobic fungi**

147 Real-time qPCR were tested on Applied Biosystems StepOne™ Real-time qPCR  
148 System based on the methods of Denman and McSweeney [31]. The designed primers were  
149 shown in the Table 2.

150

151 **Table 2. The primers for real-time qPCR assay**

152

| Target group                 | Forward primer (5'-3')           | Reverse primer (5'-3')        | Size (bp) |
|------------------------------|----------------------------------|-------------------------------|-----------|
| Total bacteria <sup>a</sup>  | CGGCAACGAGCGCA<br>ACCC           | CCATTGTAGCACGTG<br>TGTAGCC    | 130       |
| Methanogens <sup>b</sup>     | TTCGGTGGATCDCAR<br>AGRGC         | GBARGTCGWAWCCG<br>TAGAATCC    | 140       |
| Protozoa <sup>c</sup>        | GCTTTCGWTGGTAGT<br>GTATT         | CTTGCCCTCYAATCG<br>TWCT       | 223       |
| Anaerobic fungi <sup>a</sup> | GAGGAAGTAAAAGT<br>CGTAACAAGGTTTC | CAAATTCACAAAGG<br>GTAGGATGATT | 120       |

bp=Base pairs

<sup>a</sup> Cited by Denman and McSweeney [31]

<sup>b</sup> Cited by Denman et al. [32]



---

<sup>c</sup> Cited by Sylvester et al. [33]

153

154 **PCR amplification of 16S rDNA, amplicon sequence and**  
155 **processing of sequence data**

156 Based on previous comparisons [34-36], 16S rDNA had V<sub>4</sub> hyper variable regions  
157 which performed PCR amplification for microbial genomic DNA extracted from ruminal  
158 fluid samples and were adopted in the rest of the study. PCR primers which flanked bacterial  
159 16S rDNA's V<sub>4</sub> hypervariable region were designed. The forward primer with a barcode was  
160 338F 5'-ACTCCTACGGGAGGCAGCAG-3' while the reverse primer referred to 806R  
161 5'-GGACTACHVGGGTWTCTAAT-3' based on the approach of Fan et al. [37]. Below is  
162 the PCR reaction system (TransGen AP221-02, 20μL): 5×FastPfu Buffer, 2.5 mM dNTPs,  
163 Forward Primer (5μM), Reverse Primer (5μM), FastPfu Polymerase, BSA and Template  
164 DNA and ddH<sub>2</sub>O with 4μL, 2μL, 0.8μL, 0.8μL, 0.4μL, 0.2μL and 10ng respectively were  
165 added up to 20μL totally. Below are PCR conditions: One pre-denaturation cycle, 27  
166 denaturation cycles, annealing, elongation and one post-elongation cycle at 95 °C, 95 °C,  
167 55 °C, 72 °C and 72 °C for 3min, 30s, 30s, 45s and 10min respectively. Separated on 1%  
168 garose gels, products of PCR amplicon were obtained by the extraction of gels. Sequencing  
169 only adopted PCR products which were void of contaminant bands and primer dimers by  
170 means of synthesis. Illumina MiSeq PE300 proposed the paired-end approach which was  
171 taken for the sequencing of barcoded V<sub>4</sub> amplicons. The filtering of effective reads was based  
172 on the methods of [38-41]. Sequences with lower mean phred score (20bp), equivocal bases  
173 and primer mismatching or sequence lengths below 50 bp were removed. The assembly of

174 only the sequences which had an overlap above 10 bp and no mismatch was completed in  
175 accordance with their overlap sequence. Reads which were unable to be assembled were  
176 abandoned. Barcoded and sequencing primers were removed from the sequence which was  
177 assembled.

## 178 **Taxonomic classification and statistical analysis**

179 A web-based program called Usearch (version 7.0, <http://drive5.com/uparse/>) was  
180 applied to carry out taxon-dependent analysis. 16S rRNA gene sequences were used for  
181 phylogenetically consistent bacterial taxonomy according to the method of a Bayesian  
182 classifier, Ribosomal Database Project Classifier [41]. The Silva Database (Silva\_128\_16s,  
183 <http://www.arb-silva.de>) was compared to calculate the operational taxonomic units (OTUs)  
184 for all samples to show the abundance of bacterial species with 97% of identity cutoff,  
185 whereas the species for which the sum of OTUs of all the samples was more than 20 reads  
186 were retained. The richness of OTUs for each sample was produced at the level of genus. The  
187 length of all the valid bacterial sequences with primers was 440 bp on the average. The  
188 calculation of abundance at the level of genus was transformed according to  $\log_2$  and  
189 normalized as the method of Niu et al. [42]. Inter-group OTUs were compared by the  
190 generation of a Venn diagram. The bacterial community indices adopted contained Chao and  
191 Shannon's coverage. The diversity of bacteria was presented by the quantity of OTUs.

## 192 ***In vitro* rumen fermentation**

193 The substrate was made with the feed of group M in the feeding experiment by drying  
194 and grinding through a 0.45 mm sieve. Collected from different dietary treatments during the  
195 feeding experiment, the ruminal fluid was filtrated by four-layer cheesecloth and mixed with

196 pre-heated artificial saliva [43] at a ratio of 2:1 (buffer: ruminal fluid, v:v). The ruminal fluid  
197 (150 mL) which was buffered was dispensed into pre-warmed 200-mL incubation flasks.  
198 Two grams of each substrate was blended with the buffered ruminal fluid in each incubation  
199 flask which was incubated at the temperature of 39 °C for 12 h in water. The production ratio  
200 of methane was measured by real-time *in vitro* fermentation system (produced by Jilin  
201 Academy of Agricultural Sciences, code Qtfxy-6), which was tested for the effluent gas  
202 discharged from each incubation flask. The nitrogen (purity 99.99%) was passed into the  
203 incubation flask from the bottom at the speed of 200 mL/min. Methane was carried by  
204 nitrogen into an AGM10 sensor (Sensors Europe GmbH, Erkrath, FRG) and the  
205 concentration of methane was measured and recorded every 6 min [26]. The fermentation  
206 was terminated by placing flasks on ice. After opening the incubation flask, pH was measured  
207 using a PHS-3C pH meter (Shanghai INESA Scientific Instrument Co., Ltd., China), and 2  
208 mL of incubation medium was collected for NH<sub>3</sub>-N [44]. Another 1 mL of incubation  
209 medium was analyzed for volatile fatty acids (VFAs), including acetic acid (AA), propionic  
210 acid (PA), and butyric acid (BA) using gas chromatography (Agilent Technologies 7890A  
211 GC System, USA) and the method of Castro-Montoya et al. [45]. The left fluid was dried in a  
212 forced-air oven at 60 °C for 72 h and placed in sealed containers in order to analyze the *in*  
213 vitro dry matter digestibility (IVDMD) [46].

## 214 **Experimental feeds and chemical analyses**

215 Collected in plastic bags, the samples for diets were reserved at -20 °C. After the  
216 feeding experiment, the samples were warmed at 65 °C to a fixed weight. Thereafter, a 0.45  
217 mm sieve and a high-speed universal pulverizer were used to grind them for analysis. The

218 filter bag technique of ANKOM A200 (AOAC 973.18) was adopted to analyze neutral  
219 detergent fiber (NDF), acid detergent lignin (ADL) as well as acid detergent fiber (ADF). A  
220 Kjeltex 8400 analyzer unit (Foss, Sweden) was applied to measure the content of crude  
221 protein (CP) on the basis of the Kjeldahl method (AOAC 984.13). In addition, a Soxhlet  
222 apparatus was used to measure the content of ether extract (EE) based on Soxhlet extraction  
223 method (AOAC 920.85). Methods of Horwitz et al. [46] were the foundation of all chemical  
224 analyses.

## 225 **Data analysis**

226 Sequences of good quality were deeply studied through its uploading to QIIME [39].  
227 A comparison was made between valid bacterial sequences and sequences present in the  
228 Silva Database which classified the abundance calculation of each taxon with the optimal  
229 choice of classification [36]. QIIME filed the sequence length. Mothur was used for the  
230 generation of abundance and diversity indexes. After the implementation of a pseudo-single  
231 relevancy algorithm, there was 97% of OTUs identity cutoff [47-48]. For all the parameters,  
232 data was analyzed by the R-Studio software (version 7.2). Methane production was up to the  
233 approach of Sun et al. [26]. A one-way analysis of variance (ANOVA) was carried out late in  
234 each bioassay to compare selected taxonomic groups (abundant phyla or genera), bacterial  
235 community indices observed OTUs or methane production indices. Duncan's test was  
236 adopted to perform the mean comparison at the significance level of  $P < 0.05$ . Redundancy  
237 analysis (RDA) was conducted to assess the association between the nutrients in the feed and  
238 the bacterial abundance in the rumen. The relationship among bacterial abundance, methane  
239 production, peak concentration ( $C_{max}$ ) and the time to peak concentration ( $T_{max}$ ) was assessed

240 by means of Pearson's correlations. All the data was presented as means  $\pm$  S.E. (standard  
241 error).

## 242 Results

### 243 Relative quantification of total bacteria, methanogens, protozoa 244 and anaerobic fungi

245 Firstly, the results of real-time qPCR (Table 3) showed that the numbers of  
246 methanogens and protozoa were increased with the decreasing F:C but not significantly.  
247 Conversely, the numbers of total bacteria and anaerobic fungi were decreased with the  
248 decreasing F:C. And the difference of total bacteria in three groups was significant, while the  
249 difference of anaerobic fungi was not. These results exhibited that the change of F:C has  
250 extremely effect only on the number of total bacteria but not on the other kinds of  
251 microorganism.

252

253 **Table 3. Relative quantification of total bacteria, methanogens, protozoa and anaerobic**  
254 **fungi with different forage-to-concentrate ratio**

255

| Item              | Forage-to-concentrate ratio <sup>a</sup> |                 |                 | P-value |
|-------------------|------------------------------------------|-----------------|-----------------|---------|
|                   | L                                        | M               | H               |         |
| Methanogens       | 5.47 $\pm$ 0.14                          | 5.32 $\pm$ 0.11 | 5.19 $\pm$ 0.09 | 0.257   |
| Protozoa          | 4.37 $\pm$ 0.13                          | 4.17 $\pm$ 0.10 | 4.13 $\pm$ 0.13 | 0.369   |
| Anaerobic fungi   | 1.58 $\pm$ 0.07                          | 1.70 $\pm$ 0.08 | 1.86 $\pm$ 0.10 | 0.096   |
| General bacterial | 1.08 $\pm$ 0.03                          | 0.99 $\pm$ 0.04 | 0.91 $\pm$ 0.04 | 0.017   |

256 <sup>a</sup> L = forage-to-concentrate ratio 50:50; M = forage-to-concentrate ratio 70:30; H =  
257 forage-to-concentrate ratio 90:10. All the data are presented as mean  $\pm$  S.E. (standard error).

258

### 259 Analysis of DNA sequence data

260 After quality was controlled preliminarily, 517,492 paired-end 440-bp reads were  
261 obtained in total. Each sample got 28,750 sequences averagely. Reads had an overall length  
262 of 2.28 gigabases (GB), and each sample had a mean read length of 0.13 GB with 191,537,  
263 171,125, and 154,794 raw reads in L, M and H groups respectively (Table 4). Based on 97%  
264 species similarity, 132,987, 104,640 and 92,194 OTUs were separately obtained from the  
265 samples in L, M and H groups (Table 4). Among all the samples, 708 OTUs were identified,  
266 of which 542 existing in all the groups were known as key OTUs (Fig 1A). Key OTUs took  
267 up about 76.6% of all OTUs, whereas 6, 5 and 11 OTUs were individually identified in  
268 groups L, M and H respectively. Good's coverage was 99.4%, 99.3% as well as 99.2% for L,  
269 M and H groups separately, indicating the capture of dominant phylotypes by this study. The  
270 three groups were similar in diversity (Fig 1B). The richness ( $P<0.01$ ) of the rumen  
271 microbiota was related to F:C (Fig 1C).

272

273 **Table 4. Raw reads and OTUs in the groups with different forage-to-concentrate ratio**

274

| Group <sup>a</sup> | Raw reads | High quality reads | OTUs  |
|--------------------|-----------|--------------------|-------|
| L                  | 191,537   | 132,987            | 590   |
| M                  | 171,125   | 104,640            | 680   |
| H                  | 154,794   | 92,194             | 666   |
| Total              | 517,492   | 329,821            | 1,936 |

275 OTUs, operational taxonomic units.

276 <sup>a</sup> L = forage-to-concentrate ratio 50:50; M = forage-to-concentrate ratio 70:30; H =  
277 forage-to-concentrate ratio 90:10.

278

279 **Fig 1. Comparison of the operational taxonomic units (OTUs) in the groups L, M, and**

280 H. OTUs, operational taxonomic units; L, forage-to-concentrate ratio, 50:50; M,  
281 forage-to-concentrate ratio, 70:30; H, forage-to-concentrate ratio, 90:10. The number of  
282 observed OTUs sharing  $\geq 97\%$  nucleotide sequence identity is shown (1A) Venn diagram  
283 showing the common and unique OTUs among the three groups. (1B) Bacterial diversity as  
284 determined from the Shannon index of OTUs in the three groups. (1C) Bacterial richness, as  
285 reflected in the Chao index.

286

## 287 **Bacterial community structure at the levels of phylum and genus**

288 According to the results in Fig 2A, DNA sequences were distributed in different  
289 phyla. The three groups shared 14 phyla, namely *Bacteroidetes*, *Actinobacteria*,  
290 *Cyanobacteria*, *Chloroflexi*, *Elusimicrobia*, *Synergistetes*, *Fibrobacteres*, *Firmicutes*,  
291 *Lentisphaerae*, *Verrucomicrobia*, *Proteobacteria*, *Saccharibacteria*, *Spirochaetes* and  
292 *Tenericutes*. As the main components of the 14 phyla ( $P<0.01$ ) in spite of the diet,  
293 *Bacteroidetes* and *Firmicutes* occupied over 90% of all sequences. The three groups showed  
294 differences in the bacterial richness of different phyla. The remarkable differences of  
295 bacterial richness in five out of 14 phyla were discovered in the three groups (Table 5). As  
296 the dominant phylum in group L, *Bacteroidetes* ( $P<0.01$ ) accounted for about 66.14% of the  
297 sequences. Groups M and H assigned a lower percentage (60.05% and 56.80%) of the  
298 sequences to *Bacteroidetes*. Ranking the second as a phylum in all the groups, *Firmicutes*  
299 ( $P<0.01$ ) comprised roughly of 24.13%, 27.45% and 32.01% sequences in the L, M and H  
300 groups respectively. The proportion of *Firmicutes* increased with the increase of the ratio.  
301 Moreover, the richness of *Proteobacteria*, *Spirochaetes* and *Synergistetes* changed with F:C

302 (Table 5). With the increase of the ratio, the proportion of *Proteobacteria* and *Spirochaetes*  
 303 (Table 5) decreased ( $P < 0.01$ ) and the proportion of *Synergistetes* ( $P < 0.01$ ) (Table 5)  
 304 increased.

305

306 **Table 5. Relative abundance of five distinct phyla and Pearson's correlations in the**  
 307 **groups with different forage-to-concentrate ratio**

308

| Phylum                  | Forage-to-concentrate ratio <sup>a</sup> |            |            | Pearson's correlation <sup>b</sup> |
|-------------------------|------------------------------------------|------------|------------|------------------------------------|
|                         | L                                        | M          | H          |                                    |
| <i>Bacteroidetes</i>    | 66.14±2.92                               | 60.05±3.50 | 56.80±3.70 | -0.801**                           |
| <i>Firmicutes</i>       | 24.13±2.87                               | 27.45±2.92 | 32.01±2.56 | 0.814**                            |
| <i>Proteobacteria</i>   | 1.70±0.13                                | 0.77±0.07  | 0.59±0.03  | -0.920**                           |
| <i>Spirochaetae</i>     | 3.02±0.26                                | 2.41±0.26  | 0.75±0.05  | -0.951**                           |
| <i>Saccharibacteria</i> | 0.05±0.01                                | 0.22±0.03  | 0.28±0.05  | 0.932**                            |

309 <sup>a</sup> L = forage-to-concentrate ratio 50:50; M = forage-to-concentrate ratio 70:30; H =  
 310 forage-to-concentrate ratio 90:10. All the data are presented as mean ± S.E. (standard error).

311 <sup>b</sup> \* $P < 0.05$ , \*\* $P < 0.01$

312

313 At the level of genus, the identification of 150 genera in all the samples was  
 314 conducted despite F:C (Fig 2A). L, M and H groups had 141, 146 and 141 genera  
 315 respectively and shared 130 genera, whereas *Coriobacteriaceae* and *Gemella* were special for  
 316 group L (Fig 2B). 15 richest genera, comprising over 78.96% of all sequences, included  
 317 *Prevotella*, *Ruminococcus*, *Lachnospira*, *Rikenella*, *Succiniclasicum*, *Fibrobacter*,  
 318 *Christensenella*, *Saccharofermentans*, *Eubacterium*, *Papillibacter*, *Quinella*, *Phocaeicola*,  
 319 *Verllonella*, *Moryella* and *Fretibacterium*. The bacterial richness of 22 genera varied with the



320 diet ratio. The abundance of 14 bacteria increased, whereas that of eight bacteria decreased  
 321 (Table 6). Significantly different among all the groups, *Lachnospira*, *Fibrobacter* and  
 322 *Clostridium* were not linearly related to the diet ratio. Among the linearly changed genera,  
 323 *Prevotella* was the predominant genus, accounting for 50.79%, 43.06% and 34.09% of the  
 324 total sequences in L, M and H groups respectively.

325

326 **Fig 2. Phyla distribution of rumen flora and a Venn diagram of the genera in the groups**  
 327 **of different forage-to-concentrate ratio.** L, forage-to-concentrate ratio, 50:50; M,  
 328 forage-to-concentrate ratio, 70:30; H, forage-to-concentrate ratio, 90:10. (2A) Distribution of  
 329 the phyla as a percentage of the total number of identified 16S rDNA sequences in the groups  
 330 of different forage-to-concentrate ratio. (2B) Venn diagram showing the comparison of  
 331 genera between the groups at the same time points and depicting the genera that were unique  
 332 to the three groups.

333

334 **Table 6. Relative abundance of 25 distinct genera and Pearson's correlations in the**  
 335 **groups with different forage-to-concentrate ratio**

336

| Genus                  | Forage-to-concentrate ratio <sup>a</sup> |            |            | Pearson's correlation <sup>b</sup> |
|------------------------|------------------------------------------|------------|------------|------------------------------------|
|                        | L                                        | M          | H          |                                    |
| <i>Prevotella</i>      | 50.79±2.53                               | 43.06±4.48 | 34.09±4.65 | -0.901**                           |
| <i>Ruminococcus</i>    | 5.03±0.49                                | 9.18±1.34  | 10.33±0.76 | 0.902**                            |
| <i>Lachnospira</i>     | 8.48±0.77                                | 10.63±0.91 | 3.34±0.41  | -0.282                             |
| <i>Rikenella</i>       | 1.65±0.10                                | 3.72±0.60  | 14.09±0.79 | 0.730*                             |
| <i>Succiniclasicum</i> | 4.11±0.50                                | 5.49±0.29  | 7.04±0.39  | 0.963**                            |
| <i>Fibrobacter</i>     | 2.53±0.05                                | 2.89±0.11  | 1.52±0.10  | -0.603                             |
| <i>Eubacterium</i>     | 0.39±0.06                                | 0.97±0.11  | 0.96±0.12  | 0.625                              |

|                          |           |           |           |          |
|--------------------------|-----------|-----------|-----------|----------|
| <i>Papillibacter</i>     | 0.05±0.01 | 0.46±0.05 | 1.41±0.15 | 0.768*   |
| <i>Quinella</i>          | 1.31±0.14 | 0.25±0.01 | 0.07±0.01 | -0.819*  |
| <i>Verllonella</i>       | 0.61±0.06 | 0.52±0.04 | 0.25±0.03 | -0.933** |
| <i>Fretibacterium</i>    | 0.26±0.02 | 0.38±0.02 | 0.61±0.05 | 0.968**  |
| <i>Anaerovorax</i>       | 0.12±0.01 | 0.42±0.04 | 0.58±0.07 | 0.964**  |
| <i>Pseudobutyrvibrio</i> | 0.04±0.01 | 0.27±0.02 | 0.77±0.03 | 0.976**  |
| <i>Butyrvibrio</i>       | 0.11±0.02 | 0.25±0.03 | 0.61±0.04 | 0.961**  |
| <i>Ruminobacter</i>      | 0.84±0.14 | 0.09±0.01 | 0.02±0.00 | -0.686*  |
| <i>Selenomonas</i>       | 0.13±0.01 | 0.15±0.02 | 0.61±0.09 | 0.734*   |
| <i>Lachnoclostridium</i> | 0.18±0.01 | 0.20±0.02 | 0.50±0.03 | 0.788*   |
| <i>Oribacterium</i>      | 0.33±0.04 | 0.16±0.01 | 0.11±0.01 | -0.832*  |
| <i>Syntrophococcus</i>   | 0.38±0.05 | 0.11±0.01 | 0.01±0.00 | -0.957** |
| <i>Succinivibrio</i>     | 0.22±0.03 | 0.18±0.01 | 0.13±0.01 | -0.893** |
| <i>Candidatus</i>        | 0.05±0.00 | 0.19±0.02 | 0.24±0.04 | 0.926**  |
| <i>Clostridium</i>       | 0.17±0.01 | 0.25±0.02 | 0.04±0.00 | -0.631   |
| <i>Anaerotruncus</i>     | 0.04±0.00 | 0.13±0.01 | 0.25±0.01 | 0.992**  |
| <i>Olsenella</i>         | 0.33±0.01 | 0.06±0.01 | 0.02±0.00 | -0.721*  |
| <i>Ruminiclostridium</i> | 0.06±0.01 | 0.09±0.00 | 0.20±0.01 | 0.858**  |

337 <sup>a</sup> L = forage-to-concentrate ratio 50:50; M = forage-to-concentrate ratio 70:30; H =  
338 forage-to-concentrate ratio 90:10. All the data are presented as mean ± S.E. (standard error).

339 <sup>b</sup> \* $P < 0.05$ , \*\* $P < 0.01$

340

## 341 **Nutrition index in rumen and its correlation with the rumen** 342 **microbiota**

343 In terms of the RDA, our dataset changed, which was principally interpreted by the  
344 increasing F:C (Fig 3). It suggested that 100% change in bacteria was explained by all the  
345 nutrition indices whose order of contribution was CP > ADF > NDF > Starch > EE > ADL  
346 (Table 7). The two sorting axes accounted for 95.48% of the changes based on this model  
347 with the first sorting axis explaining a change of 66.37% and 29.11% for the second sorting  
348 axis. The rumen microbiota in group L was concentrated in the regions with high CP, starch

349 content and low NDF and ADF contents, whereas the rumen microbiota in group H was  
350 concentrated in the regions with high NDF and ADF contents and low CP and starch  
351 contents. The rumen microbiota in group M was concentrated in the regions with  
352 intermediate nutrient levels. According to the RDA analysis, the relevance of CP accounted  
353 for 0.72 of the microbiota ( $P<0.01$ ) as the main nutrient factor affecting the structure of  
354 microbiota. Insignificant, the relevance of EE and ADL was the lowest ( $R^2=0.41$ ,  $P>0.05$ ;  
355  $R^2=0.36$ ,  $P>0.05$ ) and they were not significant. Under the different levels of F:C, the  
356 different kinds of bacteria bacterial community were established, which could reflect the state  
357 of the microflora in the rumen fluid at the beginning of *in vitro* fermentation.

358

359 **Fig 3. Redundancy analysis of nutrition index and the rumen microbiota in the groups**  
360 **of different forage-to-concentrate ratio.** L, forage-to-concentrate ratio, 50:50; M,  
361 forage-to-concentrate ratio, 70:30; H, forage-to-concentrate ratio, 90:10. Two sorting axes  
362 accounted for 95.48% of the changes with the first sorting axis explaining a change of  
363 66.37% and 29.11% for the second sorting axis.

364

365 **Table 7. Relevance of nutrition indices in the redundancy analysis**

366

| Item   | RDA <sub>1</sub> | RDA <sub>2</sub> | R <sup>2</sup> |
|--------|------------------|------------------|----------------|
| CP     | -0.4325          | 0.9016           | 0.72**         |
| ADF    | 0.4867           | -0.8736          | 0.70**         |
| NDF    | 0.5225           | -0.8527          | 0.69**         |
| Starch | -0.5321          | 0.8467           | 0.69**         |
| EE     | 0.4641           | 0.3559           | 0.41           |
| ADL    | 0.3482           | -0.372           | 0.36           |

367 CP = crude protein, ADF = acid detergent fiber, NDF = neutral detergent fiber, EE = ether

368 extract, ADL = acid detergent lignin.

369 \* $P < 0.05$ , \*\* $P < 0.01$

370

## 371 ***In vitro* rumen fermentation characteristics, real-time methane** 372 **production and its correlation with the rumen microbiota**

373 After 12 h fermentation, the concentrations of pH, AA and A/P were decreased  
374 greatly with the decreasing F:C. Simultaneously, the concentrations of PA, BA, NH<sub>3</sub>-N, and  
375 IVDMD were increased with the decreasing F:C. The greatly growth of IVDMD had led to  
376 the massive production of VFAs (Table 8). The C<sub>max</sub> ( $P < 0.01$ , Table 9, Fig 4) and total  
377 production ( $P < 0.05$ , Table 9) of methane decreased with the increase in F:C, whereas T<sub>max</sub>  
378 ( $P < 0.01$ , Table 9, Fig 4) of methane increased with the increase of F:C. At the level of  
379 phylum, *Bacteroidetes*, *Proteobacteria* as well as *Spirochaetae* showed a positive correlation  
380 with the C<sub>max</sub> and total production, and a negative correlation with T<sub>max</sub> (Table 10).  
381 *Firmicutes* and *Saccharibacteria* were positively correlated with T<sub>max</sub>, but negatively  
382 correlated with C<sub>max</sub> and total production (Table 10). At the level of genus, *Prevotella*,  
383 *Quinella*, *Verillonella*, *Ruminobacter*, *Oribacterium*, *Succinivibrio*, *Syntrophococcus* and  
384 *Olsenella* was positively correlated with C<sub>max</sub> and total production in bacterial abundance, but  
385 negatively correlated with T<sub>max</sub> (Table 11). *Ruminococcus*, *Rikenella*, *Succiniclasticum*,  
386 *Eubacterium*, *Papillibacter*, *Pseudobutyrvibrio*, *Butyrvibrio*, *Candidatus*, *Anaerotruncus*  
387 and *Ruminiclostridium* was positively correlated with T<sub>max</sub> in bacterial abundance, but  
388 negatively correlated with C<sub>max</sub> and total production (Table 11).

389

390 **Table 8. Effect of different forage-to-concentrate ratio on *in vitro* fermentation**

391

| Item               | Forage-to-concentrate ratio <sup>a</sup> |            |            | P-value |
|--------------------|------------------------------------------|------------|------------|---------|
|                    | L                                        | M          | H          |         |
| pH                 | 6.66±0.09                                | 6.84±0.10  | 6.95±0.11  | 0.048   |
| NH <sub>3</sub> -N | 29.51±0.75                               | 28.97±0.71 | 26.80±0.59 | 0.025   |
| Acetate acid       | 47.98±0.90                               | 49.54±0.66 | 51.71±1.17 | 0.031   |
| Propionate acid    | 15.70±0.96                               | 13.75±0.67 | 12.11±0.80 | 0.018   |
| Butyrate acid      | 8.64±0.18                                | 8.04±0.16  | 7.95±0.26  | 0.049   |
| A/P                | 2.93±0.14                                | 3.40±0.13  | 4.02±0.16  | 0.004   |
| IVDMD              | 68.04±1.91                               | 62.16±1.14 | 60.51±2.15 | 0.016   |

392 A/P, Acetate acid/ Propionate acid; IVDMD, *in vitro* dry matter digestibility.

393 <sup>a</sup> L = forage-to-concentrate ratio 50:50; M = forage-to-concentrate ratio 70:30; H =  
 394 forage-to-concentrate ratio 9:1. All the data are presented as mean ± S.E. (standard error).

395

396 **Table 9. C<sub>max</sub>, T<sub>max</sub> and total production of methane *in vitro* and Pearson's correlations**  
 397 **in the groups with different forage-to-concentrate ratio**

398

| Item                     | Forage-to-concentrate ratio <sup>a</sup> |            |              | Pearson's correlation <sup>b</sup> |
|--------------------------|------------------------------------------|------------|--------------|------------------------------------|
|                          | L                                        | M          | H            |                                    |
| C <sub>max</sub> , %     | 0.25±0.01                                | 0.21±0.02  | 0.19±0.01    | -0.827**                           |
| T <sub>max</sub> , min   | 70.50±5.74                               | 96.00±4.90 | 123.00±13.46 | 0.922**                            |
| Total production, mmol/g | 35.16±2.34                               | 26.51±0.99 | 18.6±2.00    | -0.772*                            |

399 C<sub>max</sub>, peak concentration; T<sub>max</sub>, the time to peak concentration.

400 <sup>a</sup> L = forage-to-concentrate ratio 50:50; M = forage-to-concentrate ratio 70:30; H =  
 401 forage-to-concentrate ratio 90:10. All the data are presented as mean ± S.E. (standard error).

402 <sup>b</sup> \*P < 0.05, \*\*P < 0.01

403

404 **Fig. 4. Methane production curve *in vitro* with different forage-to-concentrate ratio in**

405 **the diets.** L, forage-to-concentrate ratio, 50:50; M, forage-to-concentrate ratio, 70:30; H,  
 406 forage-to-concentrate ratio, 90:10. SEM = standard error of mean.

407

408 **Table 10. Pearson's correlations between five distinct phyla and *in vitro* C<sub>max</sub>, T<sub>max</sub> and**  
 409 **total production of methane with different forage-to-concentrate ratio**

410

| Phylum                  | Pearson's correlations <sup>a</sup> |                  |                  |
|-------------------------|-------------------------------------|------------------|------------------|
|                         | C <sub>max</sub>                    | T <sub>max</sub> | Total production |
| <i>Bacteroidetes</i>    | 0.627*                              | -0.560*          | 0.503            |
| <i>Firmicutes</i>       | -0.614*                             | 0.579*           | -0.500           |
| <i>Proteobacteria</i>   | 0.563*                              | -0.727**         | 0.587*           |
| <i>Spirochaetae</i>     | 0.620*                              | -0.732**         | 0.738**          |
| <i>Saccharibacteria</i> | -0.594*                             | 0.723**          | -0.737**         |

411 C<sub>max</sub>, peak concentration; T<sub>max</sub>, the time to peak concentration.

412 <sup>a</sup>\*P < 0.05, \*\*P < 0.01

413

414 **Table 11. Pearson's correlations between 25 distinct genera and *in vitro* C<sub>max</sub>, T<sub>max</sub> and**  
 415 **total production of methane with different forage-to-concentrate ratio**

416

| Genus                      | Pearson's correlations <sup>a</sup> |                  |                  |
|----------------------------|-------------------------------------|------------------|------------------|
|                            | C <sub>max</sub>                    | T <sub>max</sub> | Total production |
| <i>Prevotella</i>          | 0.586*                              | -0.693**         | 0.739**          |
| <i>Ruminococcus</i>        | -0.723**                            | 0.652*           | -0.695**         |
| <i>Lachnospira</i>         | 0.291                               | -0.305           | 0.243            |
| <i>Rikenella</i>           | -0.566*                             | 0.712**          | -0.714**         |
| <i>Succinivibrionaceae</i> | -0.721**                            | 0.716**          | -0.768**         |
| <i>Fibrobacter</i>         | 0.274                               | -0.470           | 0.463            |
| <i>Eubacterium</i>         | -0.693**                            | 0.652*           | -0.586*          |
| <i>Papillibacter</i>       | -0.622*                             | 0.756**          | -0.722**         |
| <i>Quinella</i>            | 0.743**                             | -0.723**         | 0.677**          |
| <i>Verillonella</i>        | 0.538*                              | -0.722**         | 0.727**          |
| <i>Fretibacterium</i>      | -0.423                              | 0.760**          | -0.410           |

|                          |          |          |          |
|--------------------------|----------|----------|----------|
| <i>Anaerovorax</i>       | -0.514   | 0.558*   | -0.509   |
| <i>Pseudobutyrvibrio</i> | -0.637*  | 0.762**  | -0.754** |
| <i>Butyrvibrio</i>       | -0.623*  | 0.752**  | -0.726** |
| <i>Ruminobacter</i>      | 0.712**  | -0.694** | 0.643*   |
| <i>Selenomonas</i>       | -0.476   | 0.638*   | -0.669** |
| <i>Lachnospirillum</i>   | -0.387   | 0.664**  | -0.660** |
| <i>Oribacterium</i>      | 0.699**  | -0.746** | 0.689**  |
| <i>Succinivibrio</i>     | 0.566*   | -0.696** | 0.644*   |
| <i>Syntrophococcus</i>   | 0.741**  | -0.757** | 0.714**  |
| <i>Candidatus</i>        | -0.719** | 0.695**  | -0.729** |
| <i>Clostridium</i>       | -0.463   | 0.431    | -0.415   |
| <i>Anaerotruncus</i>     | -0.686** | 0.765**  | -0.771** |
| <i>Olsenella</i>         | 0.744**  | -0.711** | 0.703**  |
| <i>Ruminiclostridium</i> | -0.606*  | 0.543*   | -0.743** |

417  $C_{\max}$ , peak concentration;  $T_{\max}$ , the time to peak concentration.

418 <sup>a</sup> \* $P < 0.05$ , \*\* $P < 0.01$

419

## 420 Discussion

421 The  $C_{\max}$  ( $P < 0.01$ , Table 9, Fig 4) and total production ( $P < 0.05$ , Table 9) of methane  
422 decreased with the increase in F:C, whereas  $T_{\max}$  ( $P < 0.01$ , Table 9, Fig 4) of methane  
423 increased with the increase of F:C. At the level of phylum, *Bacteroidetes*, *Proteobacteria* as  
424 well as *Spirochaetae* showed a positive correlation with the  $C_{\max}$  and total production, and a  
425 negative correlation with  $T_{\max}$  (Table 10). *Firmicutes* and *Saccharibacteria* were positively  
426 correlated with  $T_{\max}$ , but negatively correlated with  $C_{\max}$  and total production (Table 10). At  
427 the level of genus, *Prevotella*, *Quinella*, *Verillonella*, *Ruminobacter*, *Oribacterium*,  
428 *Succinivibrio*, *Syntrophococcus* and *Olsenella* was positively correlated with  $C_{\max}$  and total  
429 production in bacterial abundance, but negatively correlated with  $T_{\max}$  (Table 11).  
430 *Ruminococcus*, *Rikenella*, *Succiniclasticum*, *Eubacterium*, *Papillibacter*, *Pseudobutyrvibrio*,  
431 *Butyrvibrio*, *Candidatus*, *Anaerotruncus* and *Ruminiclostridium* was positively correlated

432 with  $T_{\max}$  in bacterial abundance, but negatively correlated with  $C_{\max}$  and total production  
433 (Table 11).

434 Firstly, the results of real-time qPCR showed that the number of methanogens,  
435 protozoa and anaerobic fungi, under the change of F:C, was changed significantly except  
436 bacterial. Archaea was considered the producer of methane. But with the change of F:C in  
437 this study, the quantity of archaea was stable. It showed no significant linear relationship  
438 between the structure of archaea and methane production, which is similar to the research of  
439 Lengowski et al. [25]. The relationship between archaea and methane production has been  
440 discussed in many studies. Moreover, the main raw materials for methane synthesis, such as  
441 hydrogen, carbon dioxide and volatile fatty acids, were produced by bacteria [49]. Methane  
442 synthesis was a passive behavior of archaea to maintain rumen pressure and pH balance in  
443 the case of too high ratios of bacterial synthesis [50-51]. Therefore, methane production was  
444 more probably related to the concentration of synthetic raw materials in the rumen and the  
445 bacteria producing these materials.

446 The second goal of this experiment was to explore changes in the genus level of the  
447 rumen flora with different F:C. With the increase of the ratio, the proportion of different  
448 genera showed significant differences, revealing the effectiveness of experimental gradient  
449 design. In this study, the proportion of *Prevotella* showed a linearly increasing trend with the  
450 increase of protein levels in diets, which was consistent with the results of Xu and Gordon  
451 [52]. As a genus, *Prevotella* has many functions, mainly including promoting protein  
452 degradation and assisting other strains in enhancing the utilization of fiber materials in  
453 ruminants [53]. *Ruminococcus*, a cellulolytic bacterium [54], increased with the increasing



454 fiber. *Succinivibrio*, *Ruminobacter*, *amylophilus* and *Selenomonas* were starch-degrading  
455 bacteria that could produce acetic acid and succinic acid during starch degradation [55].  
456 Succinic acid was eventually transformed to PA [56] to provide energy for microbial protein  
457 synthesis in the rumen. With the decrease of starch content in the diets, the proportion of  
458 these three genera decreased significantly in this experiment, indicating the change of  
459 carbohydrate fermentation substrate from a non-structural carbohydrate to a structural  
460 carbohydrate. *Butyrivibrio* and *Pseudobutyrvibrio* were carbohydrate-degrading bacteria  
461 producing butyric acid [57]. In this experiment, the proportion of *Butyrivibrio* and  
462 *Pseudobutyrvibrio* decreased linearly with the increase of starch, but increased linearly with  
463 the increase of NDF and ADF in the diets, which showed that *Butyrivibrio* and  
464 *Pseudobutyrvibrio* were more likely to produce energy by using structural carbohydrates.  
465 The proportion of *Eubacterium* with the function of degrading structural carbohydrates was  
466 similar to that of *Butyrivibrio* [58].

467 In this study, the third aim was to gain a preliminary understanding of the relationship  
468 between nutrition levels and the diversity and richness of rumen microbiota in sheep under  
469 various F:C. In this experiment, CP was the most important nutrient factor contributing to the  
470 change in bacterial diversity. Bodine and Purvis [59] found that the effect of supplementation  
471 of non-structural carbohydrate is largely determined by the level of protein in the diet.  
472 Adding protein to the diet can improve the balance of energy and nitrogen and increase  
473 digestibility. CP could provide nitrogen resource for the self-replication and enzyme  
474 synthesis of bacteria [60]. ADF, NDF and starch were important nutrient factors providing  
475 carbon resource for self-replication and energy. However, starch showed a negative

476 correlation with bacterial diversity compared to ADF and NDF because of its easier  
477 decomposition as a non-structural carbohydrate. According to the studies of Kononoff and  
478 Heinrichs [61] and Drackley et al. [62], the rumen fermentation was mainly in the AA-mode  
479 when NDF and ADF contents in the diet were high and mainly in the PA-mode when starch  
480 content in the diet was high. The Chao index of OTUs increased with the increase in F:C,  
481 showing more strains of bacteria were required by the degradation of NDF and ADF to  
482 cooperate than those required by the degradation of CP and starch. These were the changes of  
483 microbiota in the rumen. EE and ADL in the diets had no significant effects on the changes in  
484 the rumen microbiota. Jenkins [63] found that only about 8% of fat in the rumen was  
485 degraded. There might be two reasons: The designed levels of EE and ADL content in the  
486 diets were too close to result in the similarity of the microbial community or these nutrients  
487 were not main energy resources for bacterial activity in the rumen so that bacteria were not  
488 sensitive to the low levels of EE [64]. Based on the above results, three kinds of rumen  
489 bacterial community were proved to be successfully established.

490 In this study, the final goal was to preliminarily understand the relationship between  
491 methane production and the rich and diversity of rumen microbiota in sheep under various  
492 F:C. In the anaerobic environment of the rumen, a variety of organic compounds could  
493 eventually be transformed to methane through decomposed by a number of microorganisms  
494 [5]. Leng and Nolan [14] showed that 80% of the nitrogen available to ruminal bacteria came  
495 from ammonia and 20% from amino acids or oligopeptides. With the increase of F:C,  $C_{\max}$  of  
496 methane was delayed. For the diet with higher CP and starch contents, methane production  
497 could reach  $C_{\max}$  more quickly, showing a significant correlation with the rumen microbiota.

498 With lower CP content in diet, bacteria required more time for protein decomposition to  
499 provide materials for their reproduction and methane synthesis, which indicated that methane  
500 synthesis needed to go through a “start-up” phase before the normal fermentation mode.  
501 Previous studies only found that  $C_{\max}$  of methane occurred at about 2 h after food intake  
502 [65-66]. The missing of the delay phenomenon could be attributed to the insufficient  
503 frequency of detection. On the other hand, both  $C_{\max}$  and total production of methane with  
504 lower CP and starch contents in the diet during fermentation were less than those in the diets  
505 with lower NDF and ADF contents. It was probably because related bacteria like *Prevotella*  
506 and *Butyrivibrio* could decompose nitrogen compounds to provide sufficient raw materials  
507 for the reproduction and synthesis of methanogenic archaea [67]. As indicated by the  
508 correlation analysis, fiber-degrading bacteria were positively correlated with  $T_{\max}$  of methane,  
509 but negatively correlated with  $C_{\max}$  and total production of methane. Compared with  
510 fiber-degrading bacteria, starch-degrading and protein-degrading bacteria showed an opposite  
511 correlation. More readily available nitrogen and degradable carbohydrates could be  
512 preferentially used by microorganisms [68], providing more effective support for methane  
513 synthesis. Furthermore,  $C_{\max}$  and  $T_{\max}$  of methane could be effective parameters for  
514 predicting the type of rumen fermentation, which however remained to be confirmed by  
515 further research.

516 Based on nutritional parameters, a new model of methane prediction with a wider  
517 range of applications is being developed in accordance with the results of the present study.  
518 The genera of bacterial, as the parameters for the prediction models, had been narrowed  
519 down. There were significant correlations between specific bacterial at the starting of

520 fermentation and real-time methane production *in vitro*. However, the dynamic changes of  
521 bacterial at the moment such as  $T_{\max}$  during the fermentation need to be explored in the  
522 following study. Additionally, the fermentation *in vivo* was more complex. For instance,  
523 nitrogen cycling in ruminants might provide bacteria with initial nitrogenous material [69].  
524 Thus, further studies are required to confirm the occurrence of this delay phenomenon *in vivo*  
525 and illustrate the process.

## 526 **Conclusions**

527 With the change in F:C, bacterial community structure and methane production in the  
528 rumen showed significant changes. Crude protein was the most important nutrient factor that  
529 contributed to the change in bacterial diversity. Among the 150 genera identified in the  
530 rumen, the abundance of 22 varied linearly with F:C. These genera would be further screened  
531 to serve as effective parameters for the methane prediction model. In addition, during the 12  
532 h *in vitro* fermentation, as F:C increased, the  $C_{\max}$  and total production of methane decreased  
533 significantly, and  $T_{\max}$  was delayed by 26–27 min. The fiber-degrading bacteria were  
534 positively correlated with this phenomenon, but starch-degrading and protein-degrading  
535 bacteria were negatively correlated with it.

## 536 **Acknowledgments**

537 We are grateful to the technical staff of the Animal Nutrition and Feed Science  
538 Laboratory at Jilin Agricultural University (Changchun, China) for their help in this work.  
539 The *in vitro* fermentation system was provided by Animal Nutrition Institute of Jilin  
540 Academy of Agricultural Sciences (Changchun, China). The work on high-throughput  
541 sequencing was outsourced to Shanghai Majorbio Technology Co., Ltd.

## 542 **References**

- 543 1. NCCC. National coordination committee on climate change. Second national  
544 communication on climate change of the people's republic of china. Beijing: China  
545 planning press; 2017.
- 546 2. Bennetzen EH, Smith P, Porter JR. Decoupling of greenhouse gas emissions from global  
547 agricultural production: 1970-2050. *Global Change Biol.* 2016; 22: 763-781. doi:  
548 10.1111/gcb.13120.
- 549 3. Wolfe RS. Unusual coenzymes of methanogenesis. *Annu. Rev. Biochem.* 1990; 10(10):  
550 396-399. doi: 10.1016/0968-0004(85)90068-4.
- 551 4. Hobson PN, Stewart CS. The rumen microbial ecosystem. London: Springer Science &  
552 Business Media; 2012.
- 553 5. Wolin MJ. The Rumen Fermentation: A model for microbial interactions in anaerobic  
554 ecosystems. *Adv. Microb. Ecol.* 1979; 3: 49-77. doi: 10.1007/978-1-4615-8279-3\_2.
- 555 6. Vlková E, Trojanová I, Rada V. Distribution of bifidobacteria in the gastrointestinal tract  
556 of calves. *Folia Microbiol.* 2006; 51(4): 325-328. doi: 10.1007/BF02931825.
- 557 7. Lee HJ, Jung JY, Oh YK, Lee SS, Madsen EL, Jeon CO. Comparative survey of rumen  
558 microbial communities and metabolites across one caprine and three bovine groups, using  
559 bar-coded pyrosequencing and <sup>1</sup>H nuclear magnetic resonance spectroscopy. *Appl.*  
560 *Environ. Microb.* 2012; 78: 5983-5993. doi: 10.1128/AEM.00104-12.
- 561 8. Jiao J, Li X, Beauchemin KA, Tan Z, Tang S, Zhou C. Rumen development process in  
562 goats as affected by supplemental feeding v. grazing: age-related anatomic development,  
563 functional achievement and microbial colonisation. *Br. J. Nutr.* 2015; 113(6): 888-900. doi:

564 10.1017/S0007114514004413.

565 9. de Menezes AB, Lewis E, O'Donovan M, O'Neill BF, Clipson N, Doyle EM. Microbiome  
566 analysis of dairy cows fed pasture or total mixed ration diets. *FEMS Microbiol. Ecol.* 2011,  
567 78, (2), 256-65. doi: 10.1111/j.1574-6941.2011.01151.x.

568 10. Carberry CA, Kenny DA, Han S, McCabe MS, Waters SM. The effect of phenotypic  
569 residual feed intake (RFI) and dietary forage content on the rumen microbial community  
570 of beef cattle. *Appl. Environ. Microbiol.* 2012; 78(14): 4949-4958. doi:  
571 10.1128/AEM.07759-11.

572 11. Petri RM, Schwaiger T, Penner GB, Beauchemin KA, Forster RJ, McKinnon JJ,  
573 McAllister TA. Characterization of the core rumen microbiome in cattle during transition  
574 from forage to concentrate as well as during and after an acidotic challenge. *PLoS One*  
575 2014; 8(12): e83424. doi: 10.1371/journal.pone.0083424.

576 12. Clark JH. Lactational responses to postruminal administration of proteins and amino  
577 acids. *J. Dairy Sci.* 1975; 58(8): 1178-1197. doi: 10.3168/jds.S0022-0302(75)84696-0.

578 13. Cunha IS, Barreto CC, Costa OY, Bomfim MA, Castro AP, Kruger RH, et al. Bacteria  
579 and archaea community structure in the rumen microbiome of goats (*Capra hircus*) from  
580 the semiarid region of Brazil. *Anaerobe* 2011; 17(3): 118-124. doi:  
581 10.1016/j.anaerobe.2011.04.018.

582 14. Leng RA, Nolan JV. Nitrogen metabolism in the rumen. *J. Dairy Sci.* 1984; 67:  
583 1072-1089. doi: 10.3168/jds.s0022-0302(05)73133-7.

584 15. Grovum WL, Leek BF. Parotid secretion and associated efferent activity inhibited by  
585 pentagastrin in sheep. *Peptides* 1988; 9(3): 519-526. doi: 10.1016/0196-9781(88)90158-1.

- 586 16. Moe PW, Tyrrell HF. Methane Production in Dairy Cows. *J. Dairy Sci.* 1979; 62(10):  
587 1583-1586. doi: 10.3168/jds.S0022-0302(79)83465-7.
- 588 17. Holter JB, Young AJ. Methane prediction in dry and lactating Holstein cows. *J. Dairy*  
589 *Sci.* 1992; 75(8): 2165-2175. doi: 10.3168/jds.S0022-0302(92)77976-4.
- 590 18. Mills JA, Kebreab E, Yates CM, Crompton LA, Cammell SB, Dhanoa MS, et al.  
591 Alternative approaches to predicting methane emissions from dairy cows. *J. Anim. Sci.*  
592 2003; 81(12): 3141-3150. doi: 10.1046/j.0931-2439.2003.00453.x.
- 593 19. Ellis JL, Kebreab E, Odongo NE, McBride BW, Okine EK, France J. Prediction of  
594 methane production dairy and beef cattle. *J. Dairy Sci.* 2007; 90: 3456-3466. doi:  
595 10.3168/jds.2006-675.
- 596 20. Jentsch W, Schweigel M, Weissbach F, Scholze H, Pitroff W, Derno M. Methane  
597 production in cattle calculated by the nutrient composition of the diet. *Arch. Anim. Nutr.*  
598 2007; 61(1): 10-19. doi: 10.1080/17450390601106580.
- 599 21. Dong RL, Zhao GY. Relationship between the methane production and the CNCPS  
600 carbohydrate fractions of rations with various concentrate / roughage ratios evaluated  
601 using *in vitro* incubation technique. *Asian Austral. J. Anim.* 2013; 26(12): 1708-1716.  
602 doi: 10.5713/ajas.2013.13245.
- 603 22. Dijkstra J, Neal HD, Beever DE, France J. Simulation of nutrient digestion, absorption  
604 and outflow in the rumen: model description. *J. Nutr.* 1992; 122(11): 2239-2256. doi:  
605 10.1093/jn/122.11.2239.
- 606 23. Mills JA, Dijkstra J, Bannink A, Cammell SB, Kebreab E, France, J. A mechanistic  
607 model of whole-tract digestion and methanogenesis in the lactating dairy cow: Model

- 608 development, evaluation, and application. *J. Anim. Sci.* 2001; 79: 1584-1597. doi:  
609 doi:10.1046/j.1439-0396.2001.00315.x.
- 610 24. Lange M, Ahring BK. A comprehensive study into the molecular methodology and  
611 molecular biology of methanogenic archaea. *FEMS Microbiol. Rev.* 2001; 25(5):  
612 553-571. doi: 10.1111/j.1574-6976.2001.tb00591.x.
- 613 25. Lengowski MB, Witzig M, Möhring J, Seyfang GM, Rodehutsord M. Effects of corn  
614 silage and grass silage in ruminant rations on diurnal changes of microbial populations in  
615 the rumen of dairy cows. *Anaerobe* 2016; 42: 6-16. doi: 10.1016/j.anaerobe.2016.07.004.
- 616 26. Sun YK, Yan XG, Ban ZB, Yang HM, Hegarty RS, Zhao YM. The effect of cysteamine  
617 hydrochloride and nitrate supplementation on *in-vitro* and *in-vivo* methane production and  
618 productivity of cattle. *Anim. Feed Sci. Tech.* 2017; 232: 49-56. doi:  
619 10.1016/j.anifeedsci.2017.03.016.
- 620 27. NRC. Nutrient requirements of small ruminants. Washington, DC: National Academies  
621 Press; 2007.
- 622 28. Murray MG, Thompson WF. Rapid isolation of high molecular weight plant DNA.  
623 *Nucleic Acids Res.* 1980; 8(19): 4321-4326. doi: 10.1093/nar/8.19.4321.
- 624 29. Zhou JZ, Bruns MA, Tiedje JM. 1996. DNA recovery from soils of diverse composition.  
625 *Appl. Environ. Microb.* 1996; 62(2): 316-322. doi: 10.1002/bit.260490302.
- 626 30. Rathgeber C, Yurkova N, Stackebrandt E, Schumann P, Humphrey E, Beatty JT, et al.  
627 *Porphyrobacter meromictius* sp. nov., an appendaged bacterium, that produces  
628 Bacteriochlorophyll *a*. *Current Microbiol.* 2007; 55: 356-361. Available from: Available  
629 from: <https://link.springer.com/article/10.1007/s00284-007-0275-y>.



- 630 31. Denman SE, McSweeney CS. Development of a real-time PCR assay for monitoring  
631 fungal and cellulolytic bacterial populations within the rumen. *FEMS Microbiol. Ecol.*  
632 2006; 58(3): 572-582. doi: 10.1111/j.1574-6941.2006.00190.x.
- 633 32. Denman SE, Tomkins NW, McSweeney CS. Quantitation and diversity analysis of  
634 ruminal methanogenic populations in response to the antimethanogenic compound  
635 bromochloromethane. *FEMS Microbiol. Ecol.* 2007; 62(3): 313-322. doi:  
636 10.1111/j.1574-6941.2007.00394.x.
- 637 33. Sylvester JT, Karnati SKR, Yu Z, Morrison M, Firkins JL. Development of an assay to  
638 quantify rumen ciliate protozoal biomass in cows using real-time PCR. *J. Nutr.* 2004;  
639 134(12): 3378-3384. doi: 10.1093/jn/134.12.3378.
- 640 34. Meng H, Zhang Y, Zhao LL, Zhao WJ, He C, Honaker CF, et al. Body weight selection  
641 affects quantitative genetic correlated responses in gut microbiota. *PloS One* 2014; 9:  
642 e89862. doi: 10.1371/journal.pone.0089862.
- 643 35. Youssef N, Sheik CS, Krumholz LR, Najar FZ, Roe BA, Elshahed MS. Comparison of  
644 species richness estimates obtained using nearly complete fragments and simulated  
645 pyrosequencing-generated fragments in 16S rRNA gene-based environmental surveys.  
646 *Appl. Environ. Microb.* 2009; 75: 5227-5236. doi: 10.1128/AEM.00592-09.
- 647 36. Lan YM, Wang Q, Cole JR, Rosen GL. Using the RDP classifier to predict taxonomic  
648 novelty and reduce the search space for finding novel organisms. *PloS One* 2012; 7:  
649 e32491. doi: 10.1371/journal.pone.0032491.
- 650 37. Fan WG, Tang YR, Qu Y, Cao FB, Huo GC. Infant formula supplemented with low  
651 protein and high carbohydrate alters the intestinal microbiota in neonatal SD rats. *BMC*

- 652 Microbiol. 2014; 14: 279. doi: 10.1186/s12866-014-0279-2.
- 653 38. Magoã T, Salzberg SL. FLASH: fast length adjustment of short reads to improve genome  
654 assemblies. *Bioinformatics* 2011; 27: 2957-2963. doi: 10.1093/bioinformatics/btr507.
- 655 39. Caporaso JG, Kuczynski J, Stombaugh J, Bittinger K, Bushman FD, Costello EK, et al.  
656 QIIME allows analysis of high-throughput community. *Nat. Methods* 2010; 7(5):  
657 335-336. doi: 10.1038/nmeth.f.303.
- 658 40. Bokulich NA, Subramanian S, Faith JJ, Gevers D, Gordon JI, Knight R, et al.  
659 Quality-filtering vastly improves diversity estimates from Illumina amplicon sequencing.  
660 *Nat. Methods* 2013; 10: 57-59. doi: 10.1038/nmeth.2276.
- 661 41. Edgar RC. Search and clustering orders of magnitude faster than BLAST. *Bioinformatics*  
662 2010; 26: 2460-2461. doi: 10.1093/bioinformatics/btq461.
- 663 42. Niu Q, Li P, Hao S, Zhang Y, Kim SW, Li H, et al. Dynamic distribution of the gut  
664 microbiota and the relationship with apparent crude fiber digestibility and growth stages  
665 in pigs. *Sci. Rep.-UK* 2015; 5: 9938. doi: 10.1038/srep09938.
- 666 43. Menke K, Steingass H. Estimation of the energetic feed value obtained from chemical  
667 analysis and *in vitro* gas production using rumen fluid. *Anim. Res. Dev.* 1988; 28(1):  
668 7-55.
- 669 44. Preston TR. Tropical animal feeding: a manual for research workers. In: *Animal*  
670 *production and health*. Rome: Food and Agriculture Organization; 1998. pp. 126.
- 671 45. Castro-Montoya J, Campeneere SD, Ranst GV, Fievez V. Interactions between methane  
672 mitigation additives and basal substrates on *in vitro* methane and VFA production. *Anim.*  
673 *Feed Sci. Technol.* 2012; 176(1-4): 47-60. doi: 10.1016/j.anifeedsci.2012.07.007.

- 674 46. Horwitz W. Official methods of analysis of AOAC international. Maryland: AOAC  
675 International Publishing; 2006.
- 676 47. Schloss PD, Westcott SL, Ryabin T, Hall JR, Hartmann M, Hollister EB, et al.  
677 Introducing mothur: open-source, platform-independent, community-supported software  
678 for describing and comparing microbial communities. *Appl. Environ. Microb.* 2009; 75:  
679 7537-7541. doi: 10.1128/AEM.01541-09.
- 680 48. Kim HB, Borewicz K, White BA, Singer RS, Sreevatsan S, Tu ZJ. Microbial shifts in the  
681 swine distal gut in response to the treatment with antimicrobial growth promoter, tylosin.  
682 *P. Natl. Acad. Sci.* 2012; 109: 15485-15490. doi: 10.1073/pnas.1205147109.
- 683 49. Akin DE, Benner R. Degradation of polysaccharides and lignin by ruminal bacterial and  
684 fungi. *Appl. Environ. Microb.* 1988; 54(5): 1117-1125. doi: 10.1002/bit.260310818.
- 685 50. Thauer RK, Kaster A, Seedof H, Buckel W, Hedderich R. Methanogenic archaea:  
686 ecologically relevant differences in energy conservation. *Nat. Rev. Microbiol.* 2008; 6(8):  
687 579-591. doi: 10.1038/nrmicro1931.
- 688 51. Sakai S, Imachi H, Sekiguchi Y, Tseng L, Ohashi A, Harada H, Kamagata Y. Cultivation  
689 of methanogens under low-hydrogen conditions by using the coculture method. *Appl.*  
690 *Environ. Microb.* 2009; 75(14): 4892-4896. doi: 10.1128/AEM.02835-08.
- 691 52. Xu J, Gordon JI. Honor thy symbionts. *Proc. Natl. Acad. Sci.* 2003; 100: 10452-10459.  
692 doi: 10.1073/pnas.1734063100.
- 693 53. Petri RM, Schwaiger T, Penner GB, Beauchemin KA, Forster RJ, Mckinnon JJ, et al.  
694 Changes in the rumen epimural bacterial diversity of beef cattle as affected by diet and  
695 induced ruminal acidosis. *Appl. Environ. Microb.* 2013; 79: 3744-3755. doi:

696 10.1128/AEM.03983-12.

697 54. Grinberg IR, Yin GH, Borovok I, Miller MEB, Yeoman GJ, Dassa B, et al. Functional  
698 phylotyping approach for assessing intraspecific diversity of ruminococcus albus within  
699 the rumen microbiome. FEMS Microbiol. Lett. 2014; 362(3): 1. doi:  
700 10.1093/femsle/fnu047.

701 55. Sun B, Wang X, Bernstein S, Huffman MA, Xia DP, Gu Z, et al. Marked variation  
702 between winter and spring gut microbiota in free-ranging Tibetan Macaques (*Macaca*  
703 *thibetana*). Sci. Rep. 2016; 6: 26035. doi: 10.1038/srep26035.

704 56. Li XZ, Park BK, Shin JS, Choi SH, Smith SB, Yan CG. Effects of dietary linseed oil and  
705 propionate precursors on ruminal microbial community, composition, and diversity in  
706 yanbian yellow cattle. PloS One 2015; 10: e0126473. doi: 10.1371/journal.pone.0126473.

707 57. Gill JW, King KW. Nutritional characteristics of a *Butyrivibrio*. J. Bacteriol. 1958  
708 ; 75: 666-673. Available from: [http://europepmc.org/backend/ptpmcrender.fcgi?accid=](http://europepmc.org/backend/ptpmcrender.fcgi?accid=PMC290133&blobtype=pdf)  
709 [PMC290133&blobtype=pdf](http://europepmc.org/backend/ptpmcrender.fcgi?accid=PMC290133&blobtype=pdf).

710 58. Taguchi H, Koike S, Kobayashi Y, Cann IKO, Karita S. Partial characterization of  
711 structure and function of a xylanase gene from the rumen hemicellulolytic bacterium  
712 *Eubacterium ruminantium*. Anim. Sci. J. 2015; 75: 325-332. doi:  
713 10.1111/j.1740-0929.2004.00193.x.

714 59. Bodine TN, Purvis HT. Effects of supplemental energy and/or degradable intake protein  
715 on performance, grazing behavior, intake, digestibility, and fecal and blood indices by  
716 beef steers grazed on dormant native tallgrass prairie. J. Anim. Sci. 2003; 81(1): 304-317.  
717 doi: 10.4081/ijas.2003.s1.640.

- 718 60. Russell JB. 1983. Fermentation of peptides by *Bacteroides Ruminicola* B<sub>14</sub>. Appl.  
719 Environ. Microb. 45, 1566-1574. Available from: <https://aem.asm.org/content/45/5/1566>.
- 720 61. Kononoff PJ, Heinrichs AJ. The effect of corn silage particle size and cottonseed hulls on  
721 cows in early lactation. J. Dairy Sci. 2003; 86: 2438-2451. doi:  
722 10.3168/jds.S0022-0302(03)73838-7.
- 723 62. Drackley JK, Beaulieu AD, Elliott JP. Responses of milk fat composition to dietary fat or  
724 nonstructural carbohydrates in Holstein and Jersey cows. J. Dairy Sci. 2001; 84:  
725 1231-1237. doi: 10.3168/jds.s0022-0302(01)74584-5.
- 726 63. Jenkins TC. Lipid metabolism in the rumen. Prog. Lipid Res. 1993; (76): 3851-3863. doi:  
727 10.3168/jds.S0022-0302(93)77727-9.
- 728 64. Knapp DM, Grummer RR, Dentine MR. The response of lactating dairy cows to  
729 increasing levels of whole roasted soybeans. J. Dairy Sci. 1991; 74: 2563-2572. doi:  
730 10.3168/jds.S0022-0302(91)78434-8.
- 731 65. Kinsman R, Sauer FD, Jackson HA, Wolynetz MS. Methane and carbon dioxide  
732 emissions from dairy cows in full lactation monitored over a six-month period. J. Dairy  
733 Sci. 1995; 78: 2760-2766. doi: 10.3168/jds.S0022-0302(95)76907-7.
- 734 66. Van Haarlem RP, Desjardins RL, Gao Z, Flesch TK, Li X. 2008. Methane and ammonia  
735 emissions from a beef feedlot in western Canada for a twelve-day period in the fall. Can.  
736 J. Anim. Sci. 88, 641-649. doi: 10.4141/CJAS08034.
- 737 67. Zhou M, Mcallister TA, Guan LL. Molecular identification of rumen methanogens:  
738 Technologies, advances and prospects. Anim. Feed Sci. Tech. 2011; 166-167: 76-86. doi:  
739 10.1016/j.anifeedsci.2011.04.005.

- 740 68. Mould FL, Mann RO. Associative effects of mixed feeds. I. Effects of type and level of  
741 supplementation and the influence of the rumen fluid pH on cellulolysis in vivo and dry  
742 matter digestion of various roughages. *Anim. Feed Sci. Tech.* 1983; 10: 15-30. doi:  
743 10.1016/0377-8401(83)90003-2.
- 744 69. Russell JB, O'Connor JD, Fox DG, Van Soest PJ, Sniffen CJ. A net carbohydrate and  
745 protein system for evaluating cattle diets: I. Ruminant fermentation. *J. Anim. Sci.* 1992;  
746 70: 3551-3561. doi: 10.2527/1992.70113551x.

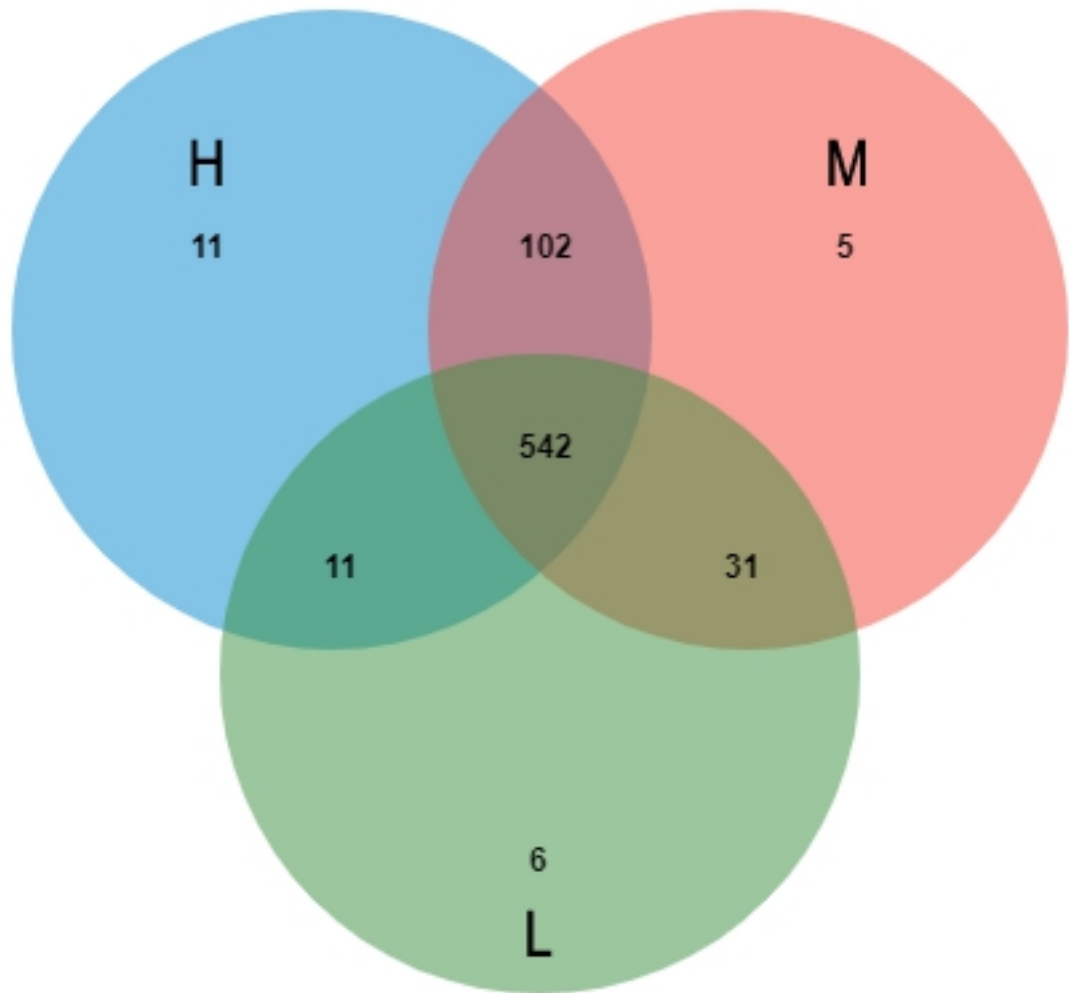

Fig1A

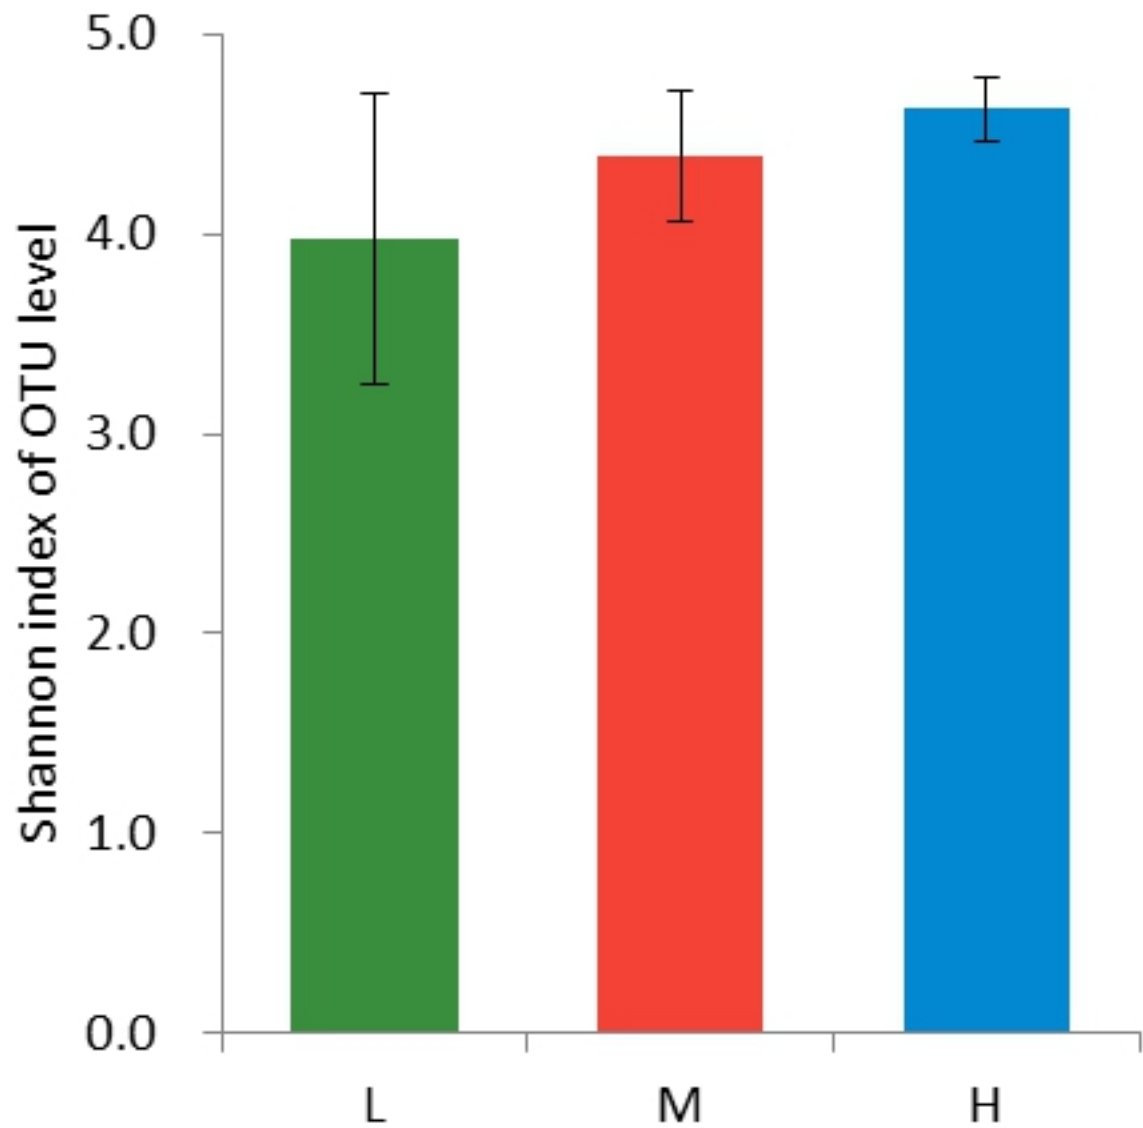

Fig1 B



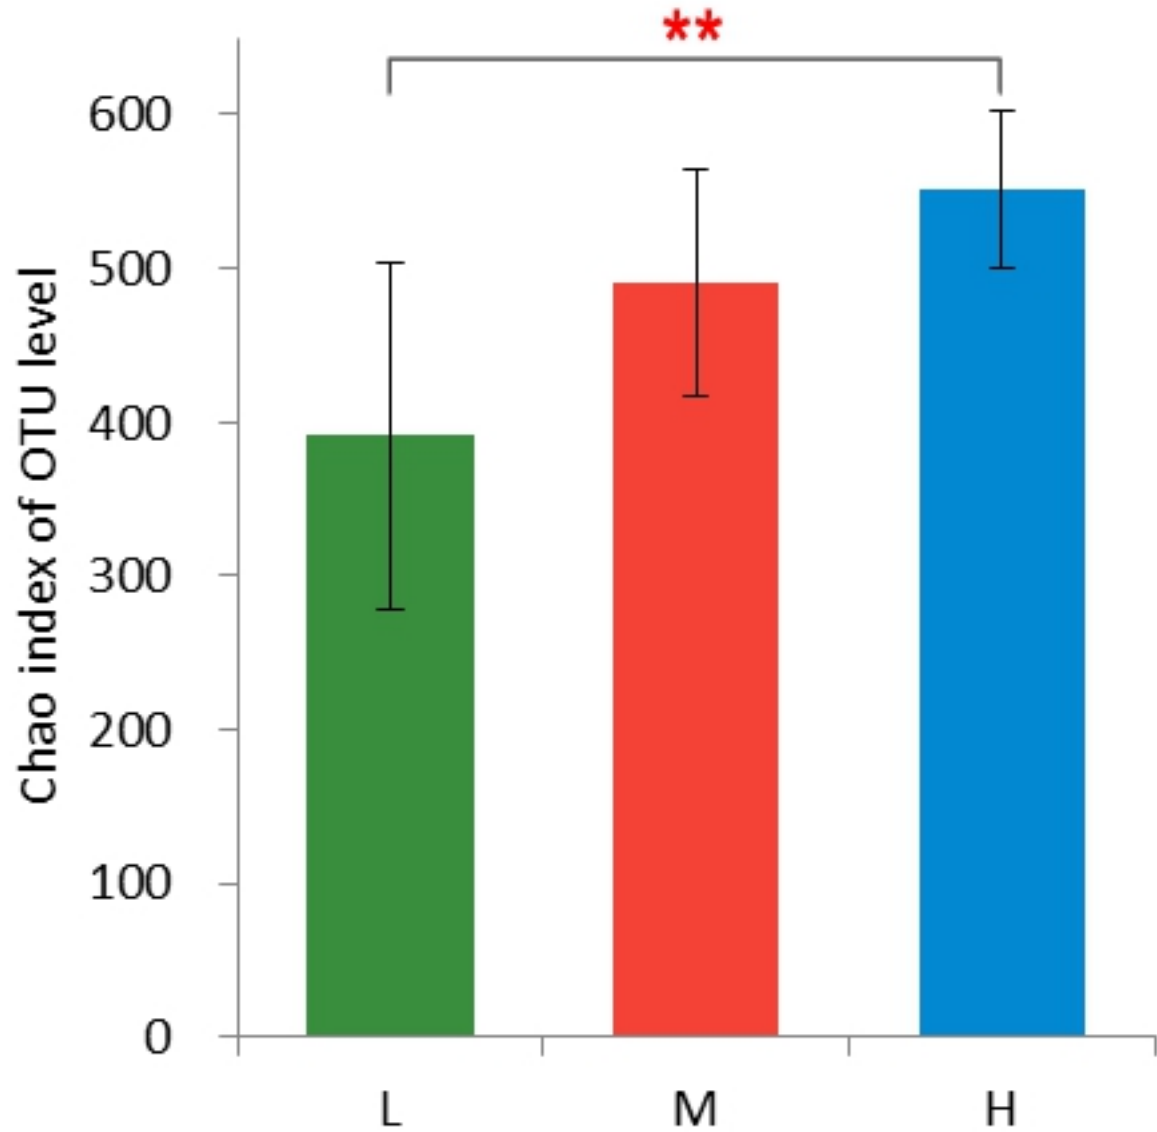

Fig1C

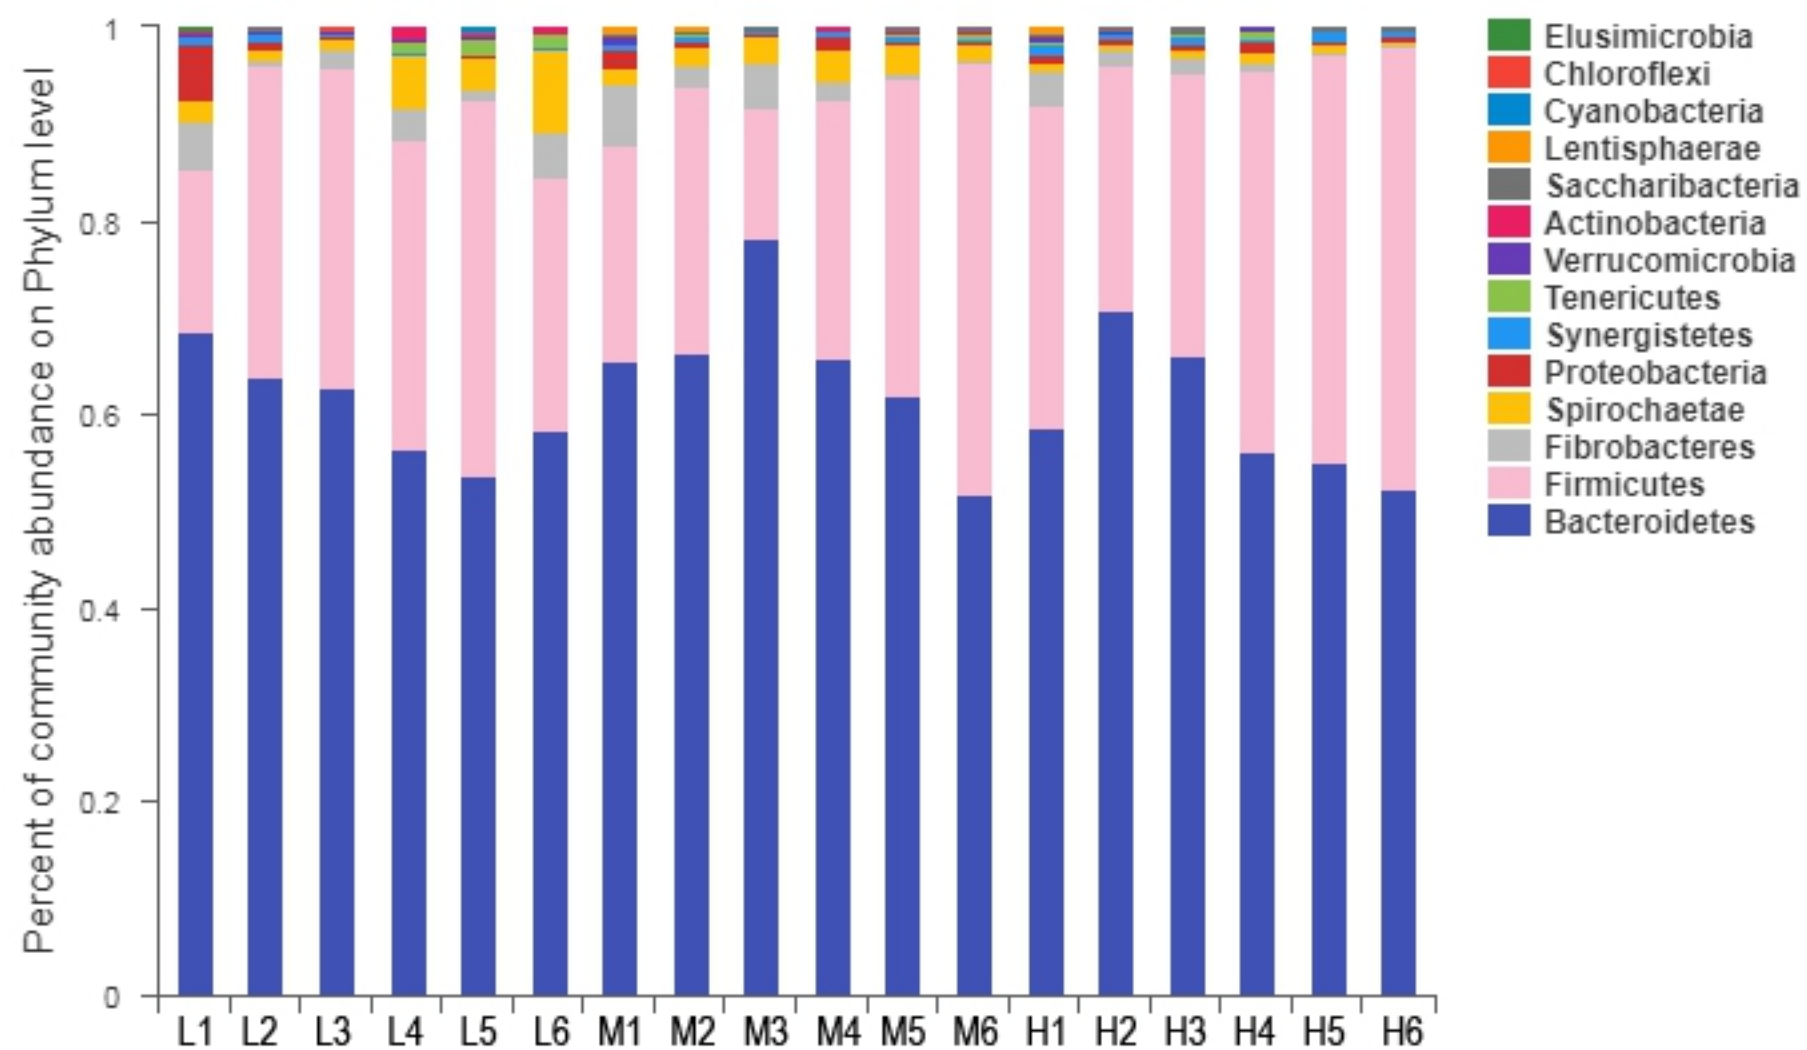

Fig2A

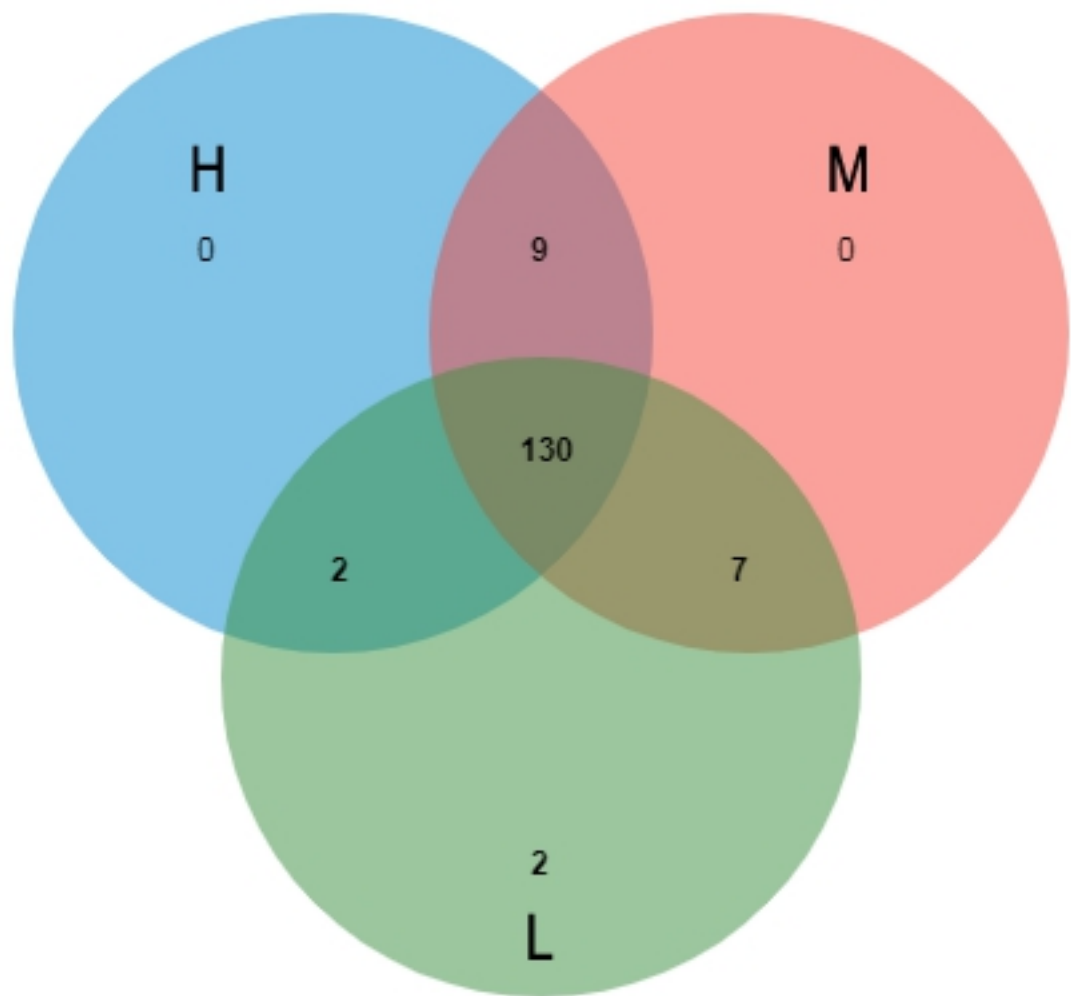

Fig2B

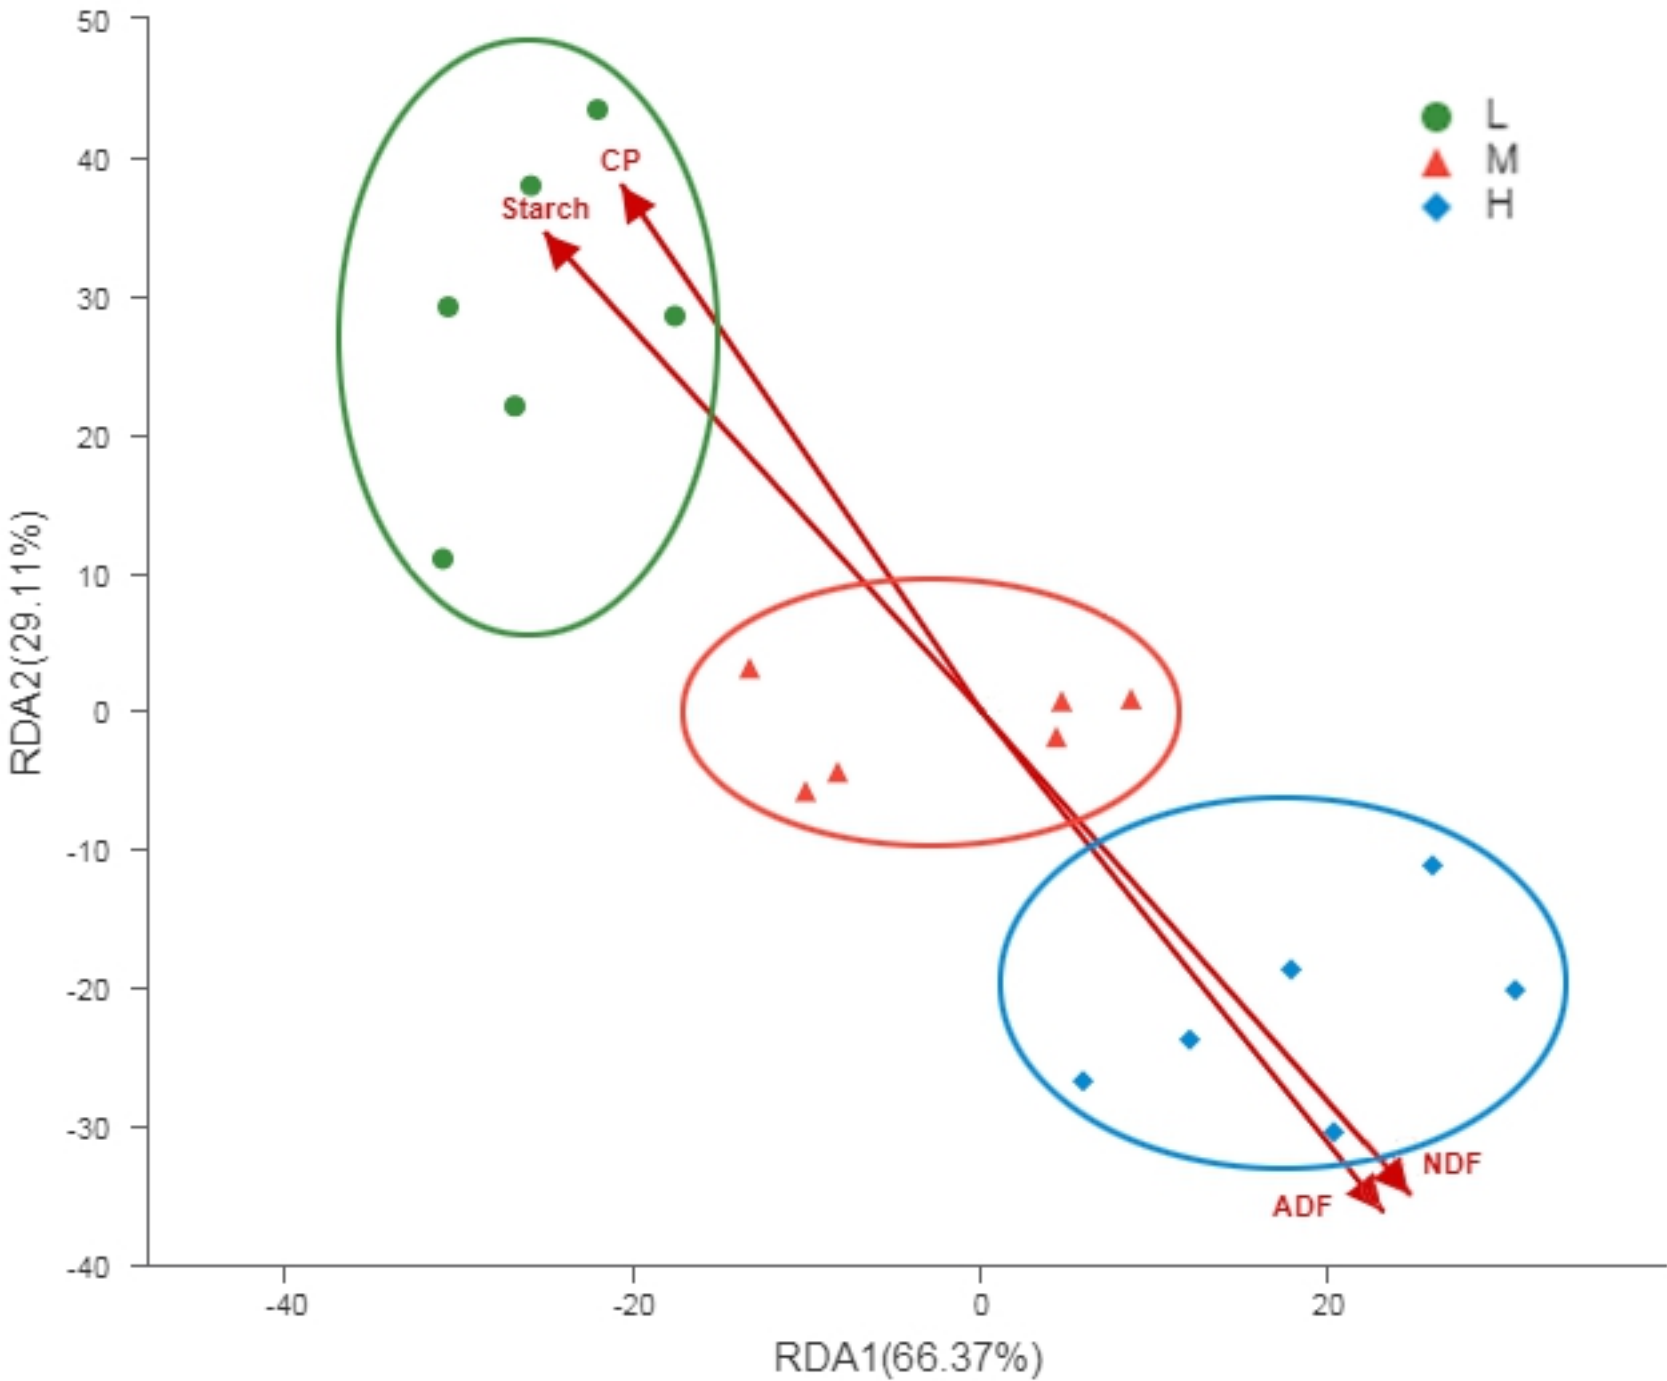

Fig3

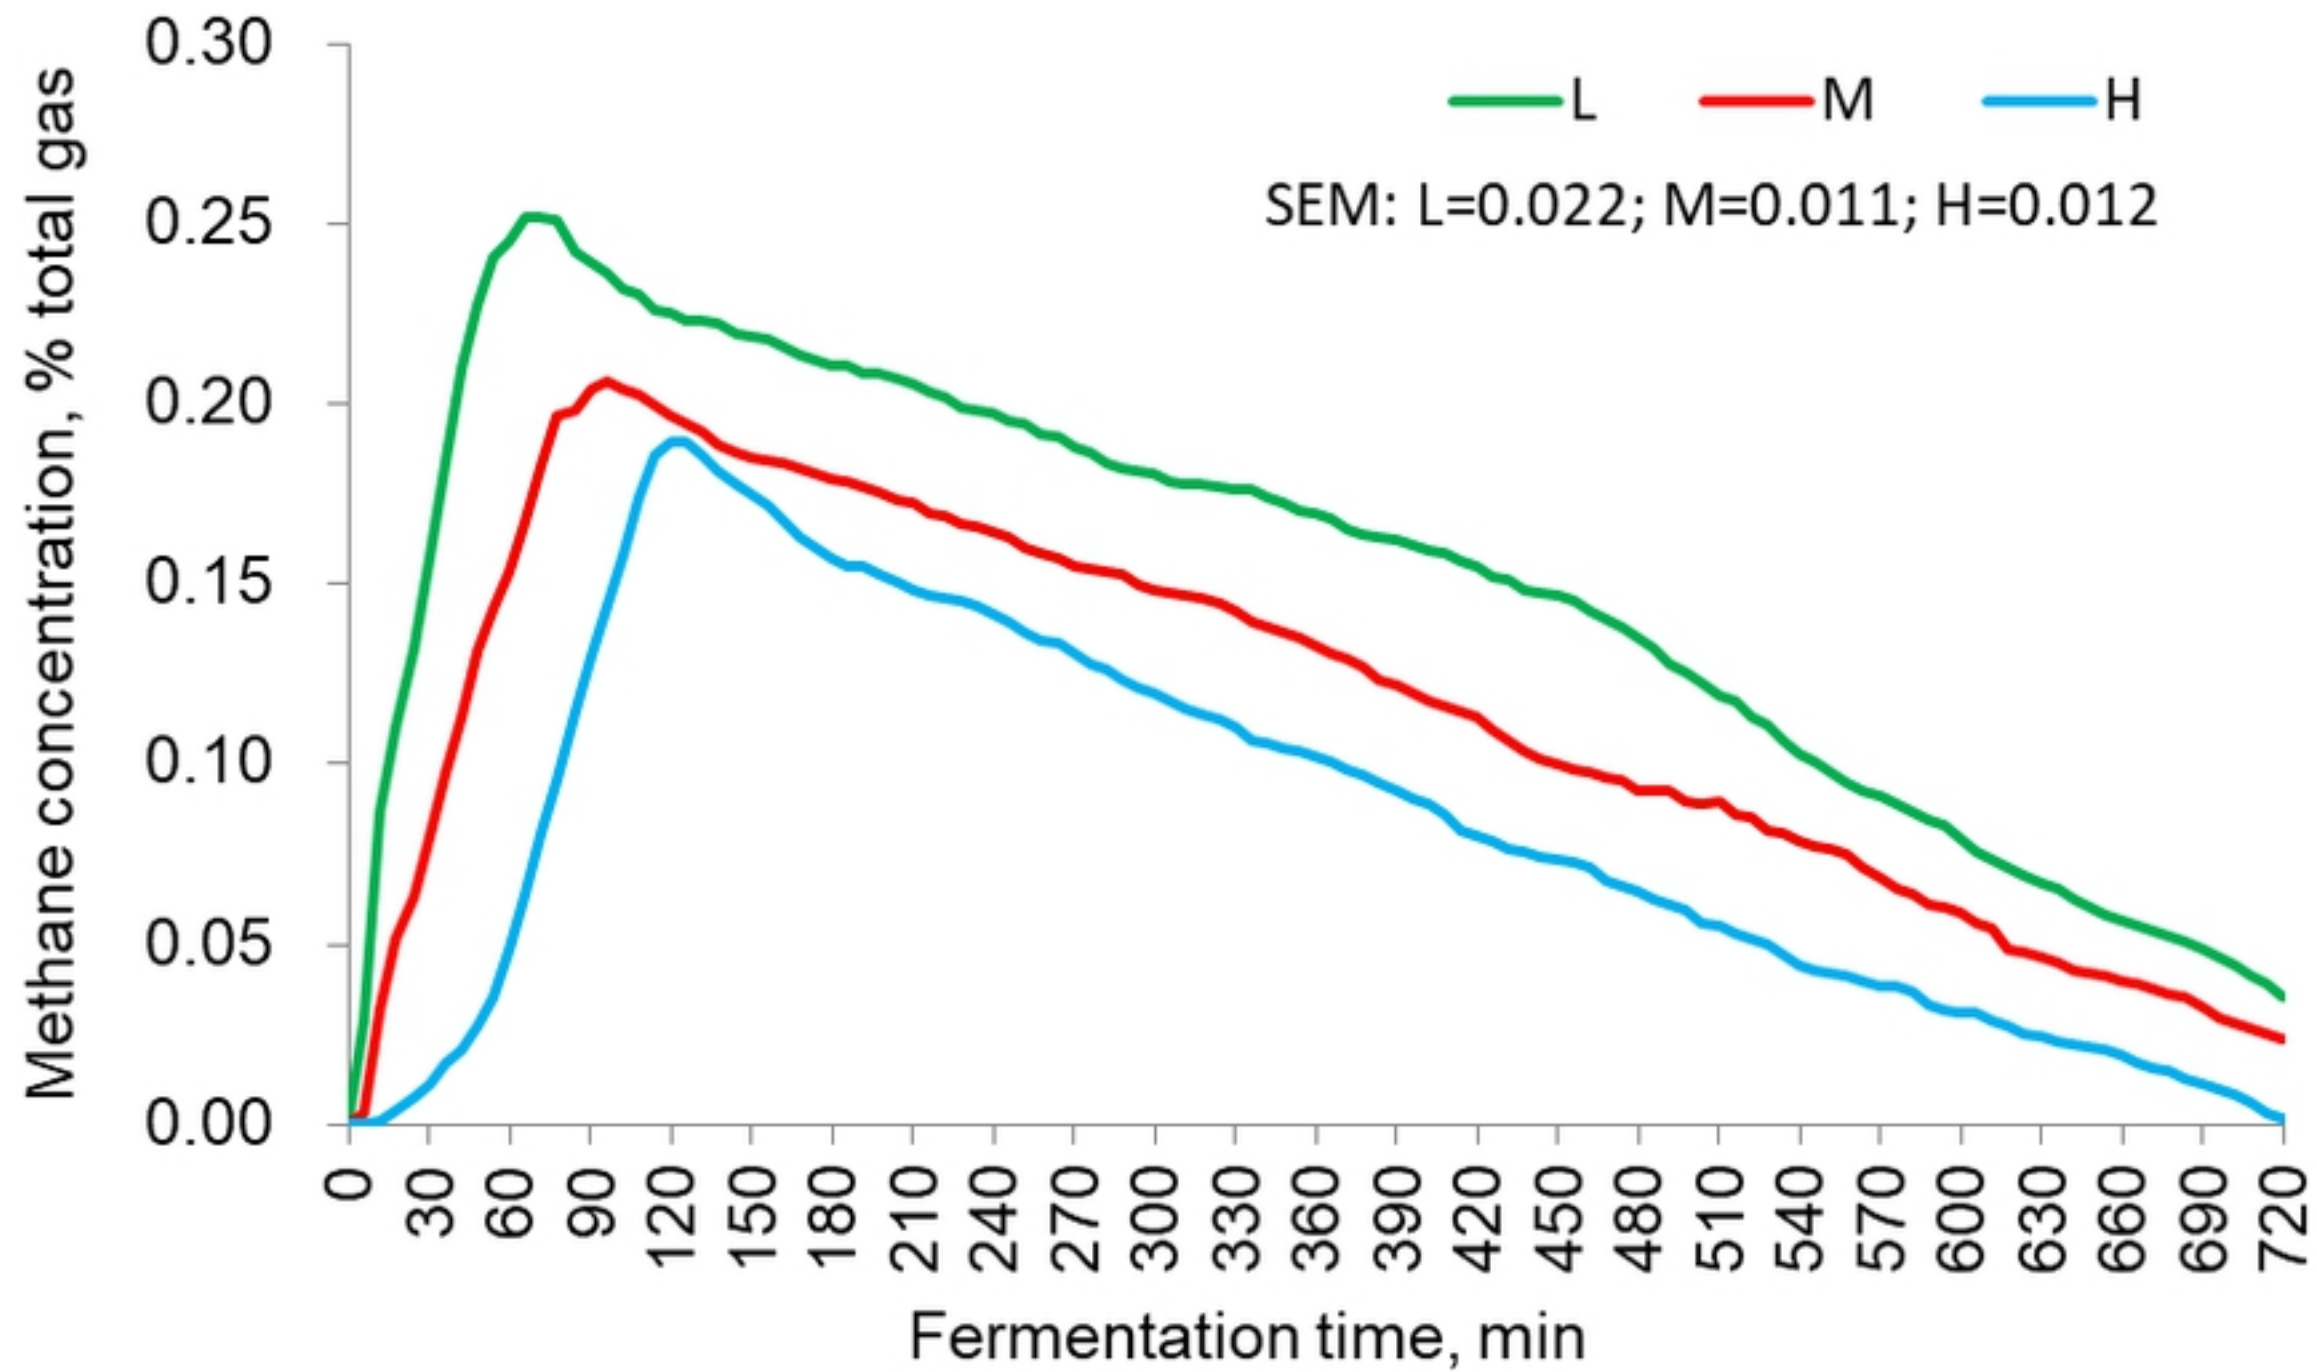

Fig 4
